# Supplementary material for: C4-aldehyde of guaiazulene: synthesis and derivatisation
Source: Royal Society of Chemistry journal article supplement (doi:10.1039/d0ob02567d), 2021-01-01
Supplement: d0ob02567d1.pdf [file d0ob02567d1.pdf]

## Guaiazulene-4-carbaldehyde: Synthesis and Derivatisation

Georgia E. Williams, Gabriele Kociok-Köhn, Tony D. James and Simon E. Lewis

# ELECTRONIC SUPPORTING INFORMATION

|                                                                                  |          |
|----------------------------------------------------------------------------------|----------|
| <sup>1</sup> H NMR spectra of selected neutral and protonated azulenes . . . . . | Page S2  |
| UV-vis absorbance titrations of selected azulenes with TFA . . . . .             | Page S5  |
| Visible region absorbance spectra of selected azulenes . . . . .                 | Page S8  |
| <sup>1</sup> H and <sup>13</sup> C NMR spectra of all novel compounds . . . . .  | Page S10 |
| X-ray crystallographic data for <b>11</b> . . . . .                              | Page S22 |

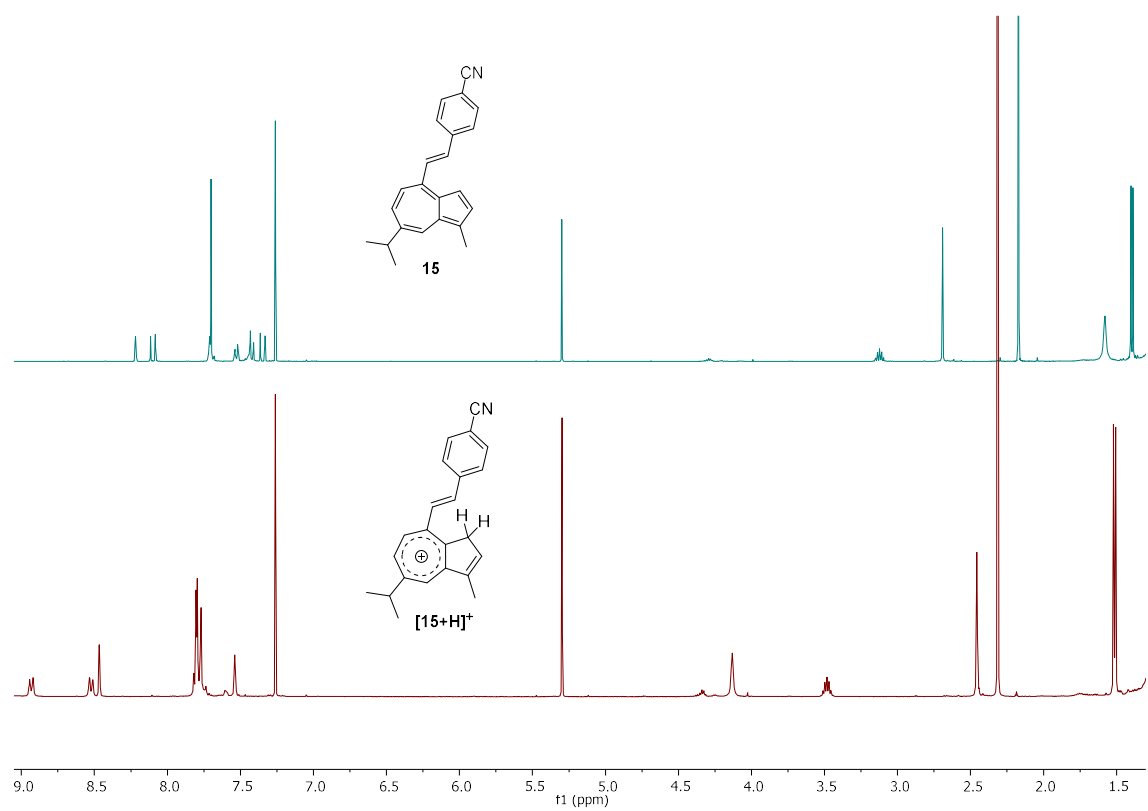

**Figure S1:** *Top:*  $^1\text{H-NMR}$  spectrum of **15** in  $\text{CDCl}_3$ . *Bottom:*  $^1\text{H-NMR}$  spectrum of **15** in TFA/ $\text{CDCl}_3$  1:9.

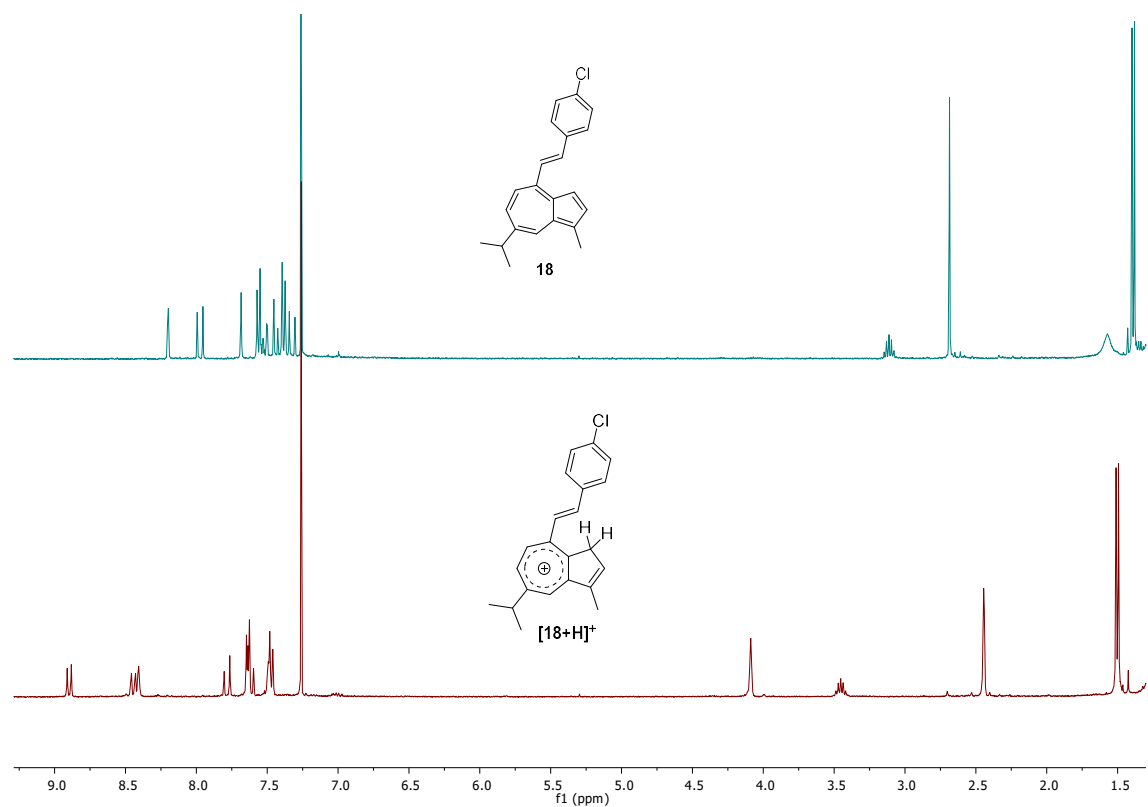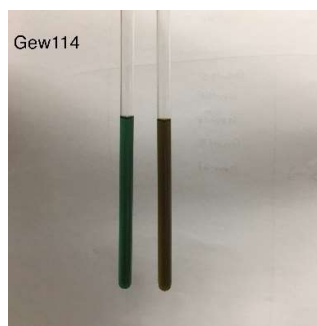

**Figure S2:** *Top:*  $^1\text{H-NMR}$  spectrum of **18** in  $\text{CDCl}_3$ . *Middle:*  $^1\text{H-NMR}$  spectrum of **18** in  $\text{TFA/CDCl}_3$  1:9. *Bottom:* NMR tubes containing **18** in  $\text{CDCl}_3$  (left) and **1** in  $\text{TFA/CDCl}_3$  (right).

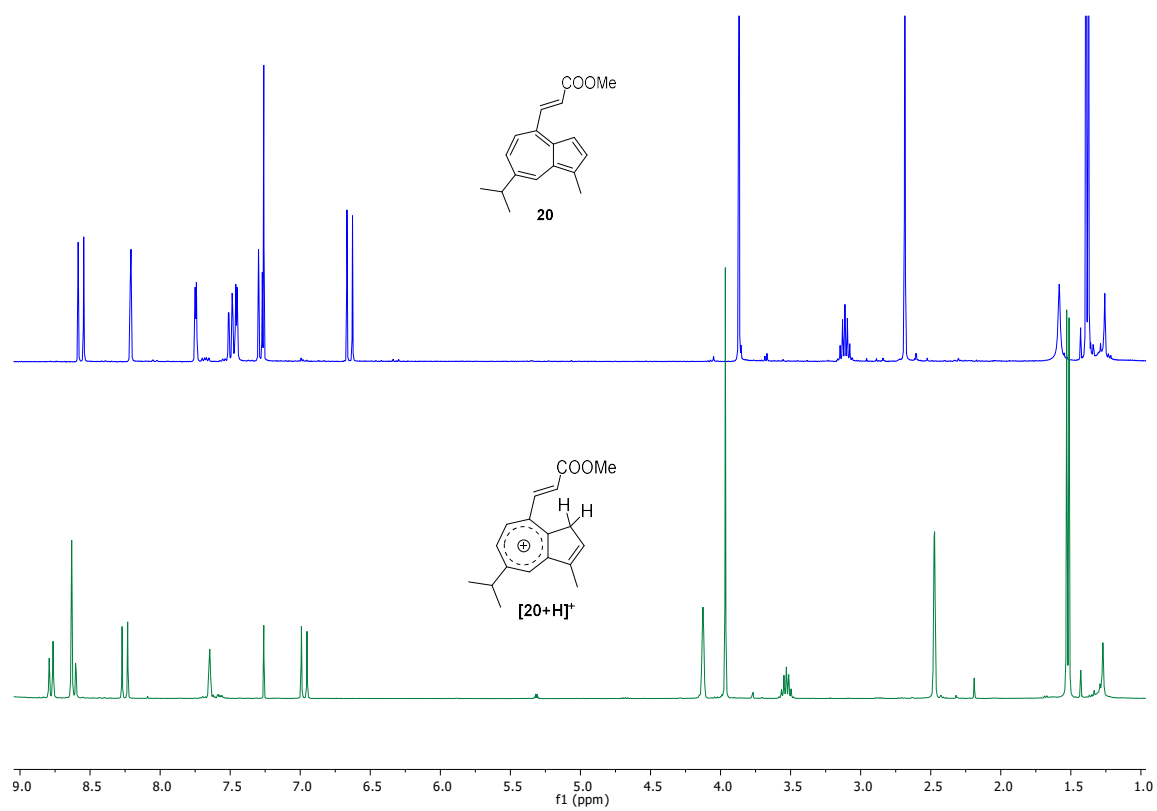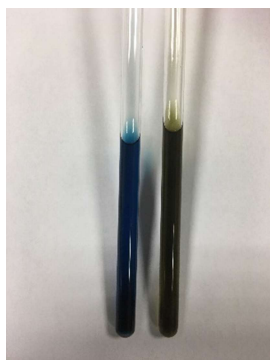

**Figure S3:** *Top:*  $^1\text{H-NMR}$  spectrum of **20** in  $\text{CDCl}_3$ . *Middle:*  $^1\text{H-NMR}$  spectrum of **20** in  $\text{TFA}/\text{CDCl}_3$  1:9. *Bottom:* NMR tubes containing **20** in  $\text{CDCl}_3$  (left) and **1** in  $\text{TFA}/\text{CDCl}_3$  (right).

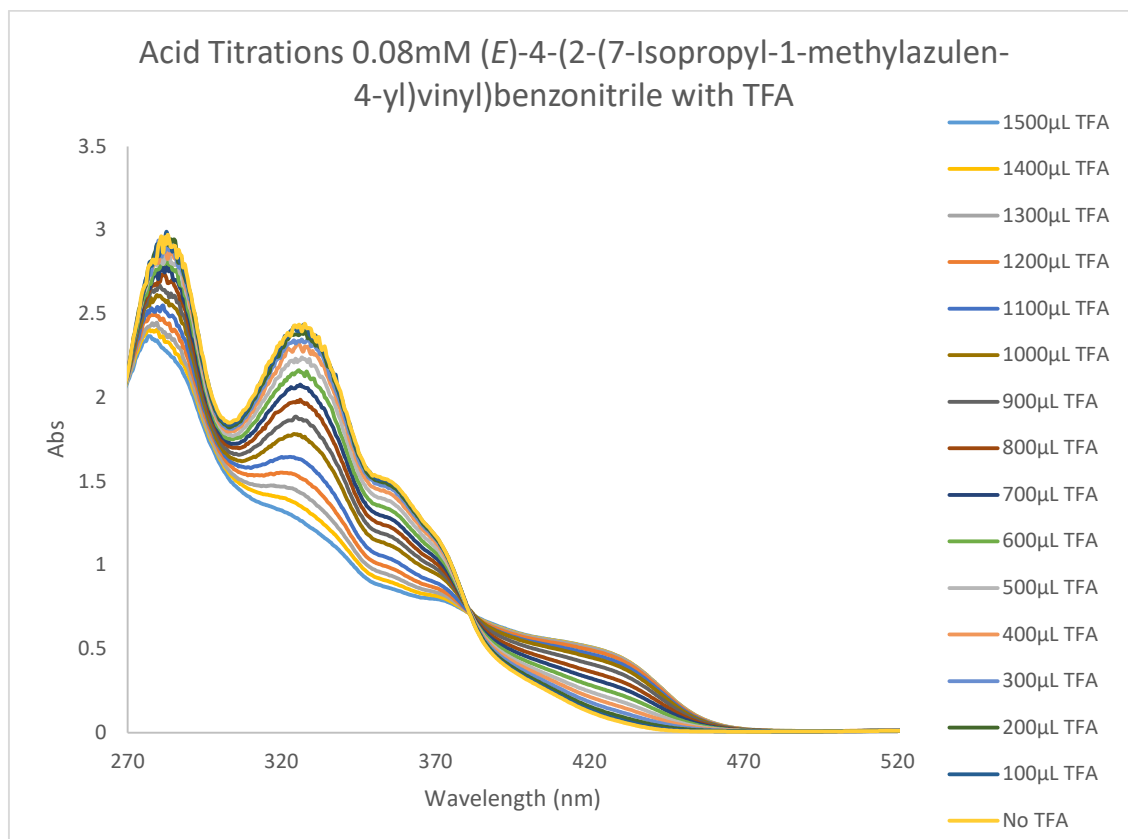

**Figure S4:** Titration of **15** with TFA in CH<sub>2</sub>Cl<sub>2</sub>.

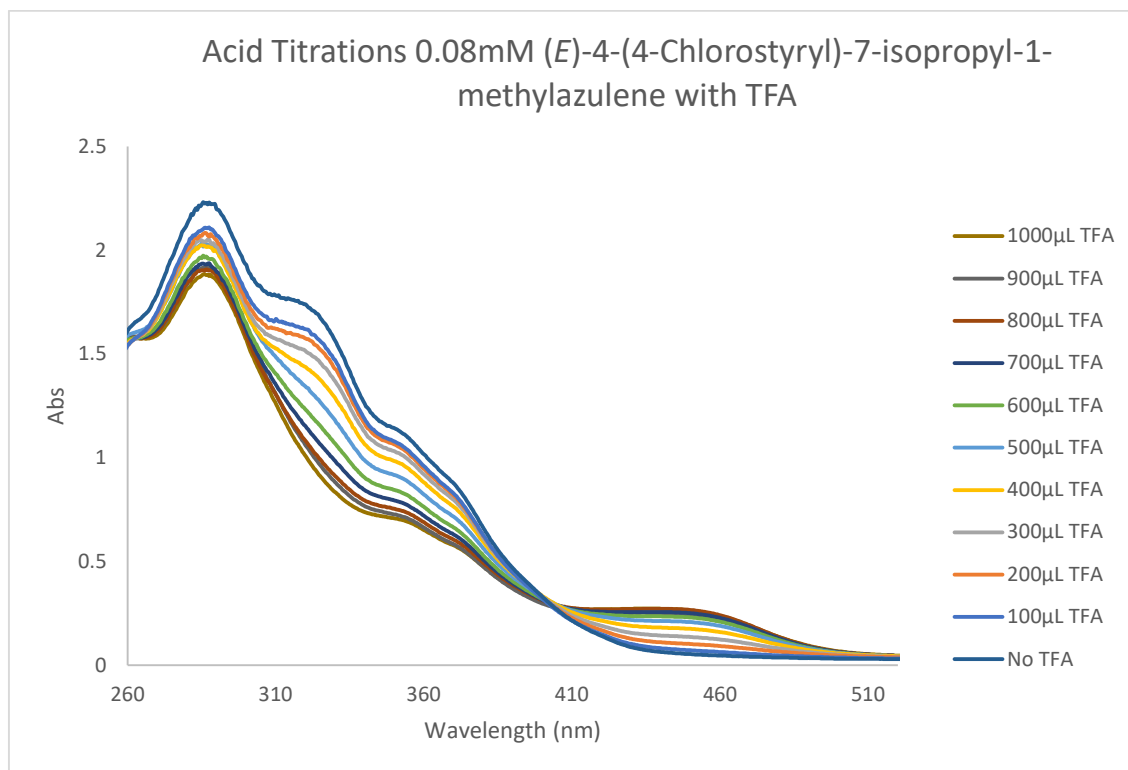

**Figure S5:** Titration of **18** with TFA in CH<sub>2</sub>Cl<sub>2</sub>.

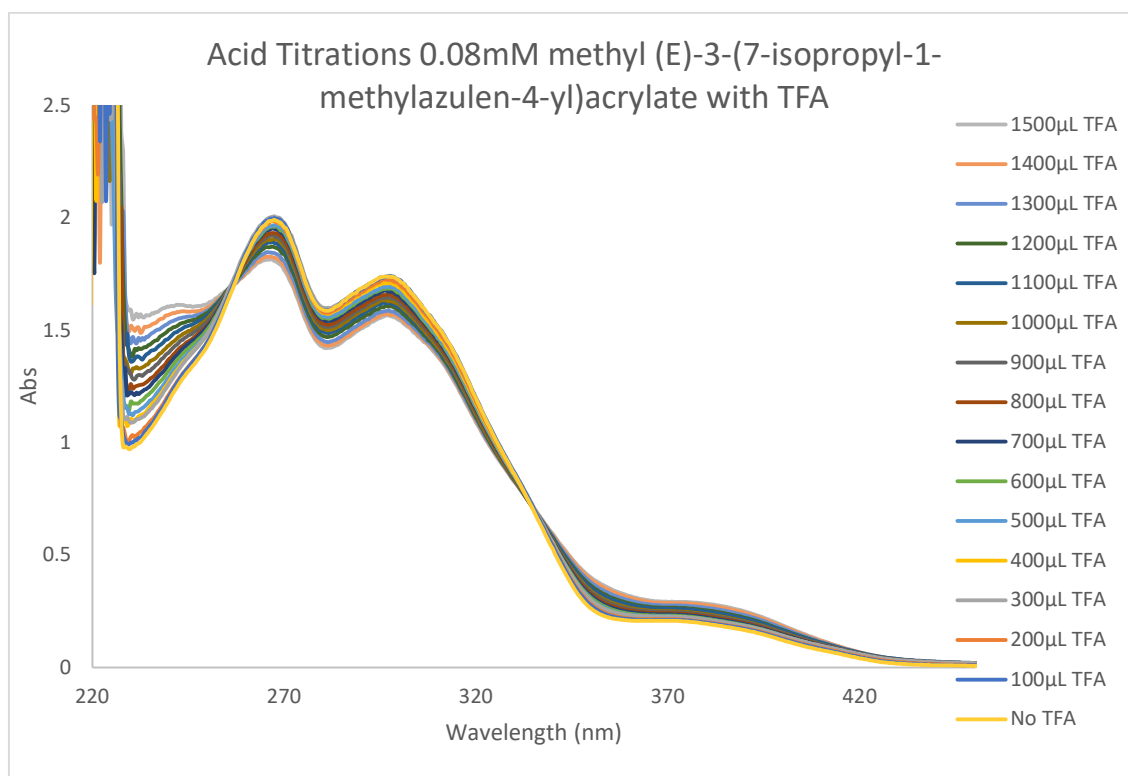

**Figure S6:** Titration of **20** with TFA in  $\text{CH}_2\text{Cl}_2$ .

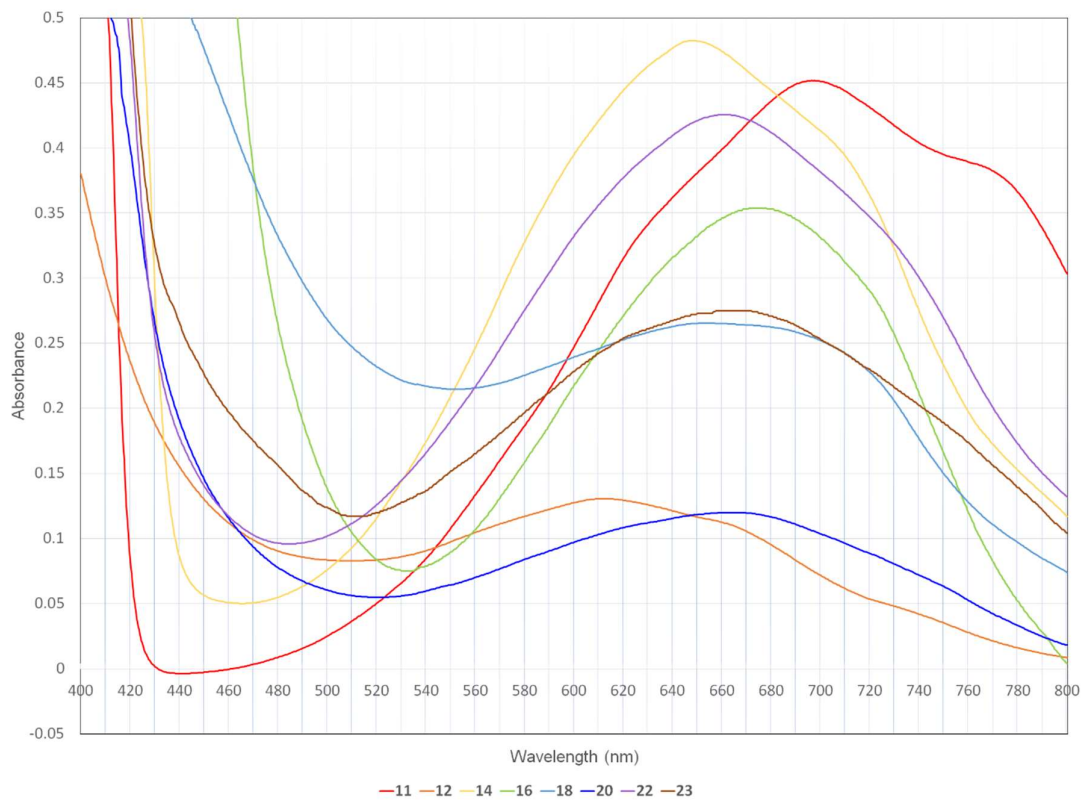

**Figure S7:** Visible region absorption spectra of selected azulenes in  $\text{CH}_2\text{Cl}_2$  (normalised to 0.1 mM)

**Table S1:** Absorption maxima of selected azulenes in  $\text{CH}_2\text{Cl}_2$ .

| Azulene   | $\lambda_{\text{max}}$ [nm] ( $\log \epsilon$ ) |
|-----------|-------------------------------------------------|
| <b>11</b> | 697 (2.65)                                      |
| <b>12</b> | 612 (2.12)                                      |
| <b>14</b> | 648 (2.68)                                      |
| <b>16</b> | 675 (2.55)                                      |
| <b>18</b> | 654 (2.42)                                      |
| <b>20</b> | 664 (2.08)                                      |
| <b>22</b> | 661 (2.63)                                      |
| <b>23</b> | 665 (2.44)                                      |



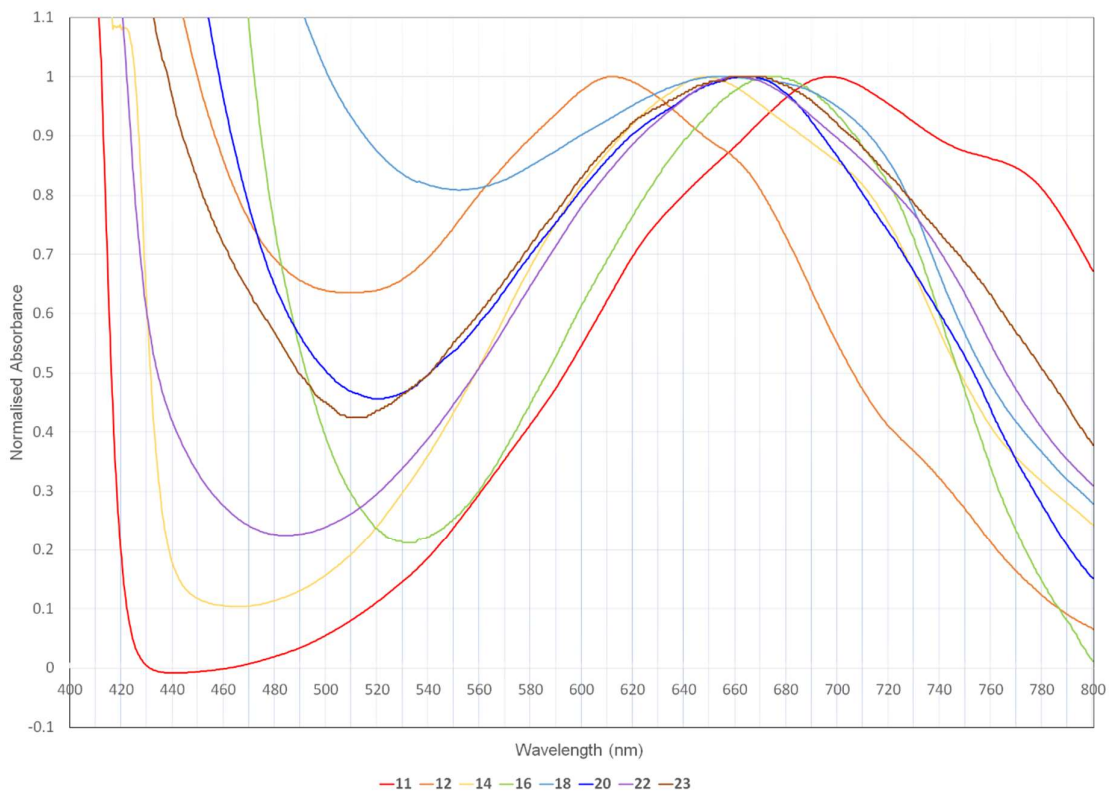

**Figure S8:** Visible region absorption spectra of selected azulenes in CH<sub>2</sub>Cl<sub>2</sub> (normalised Abs = 1)

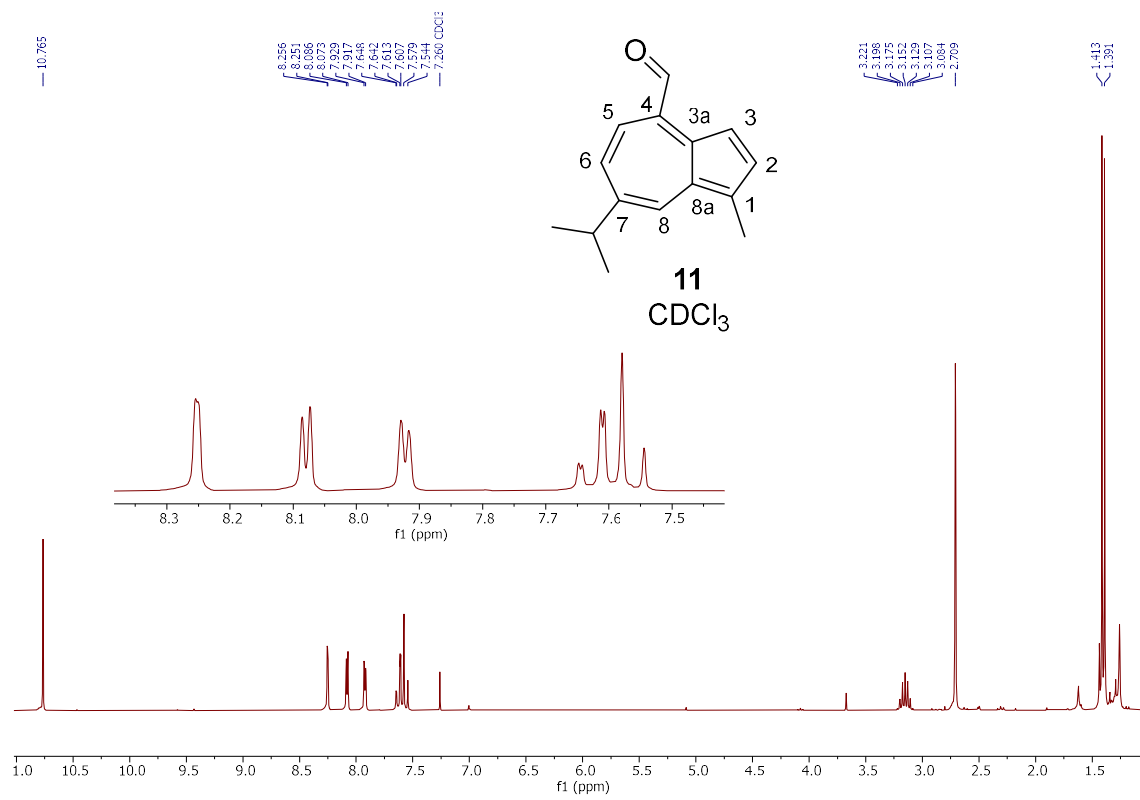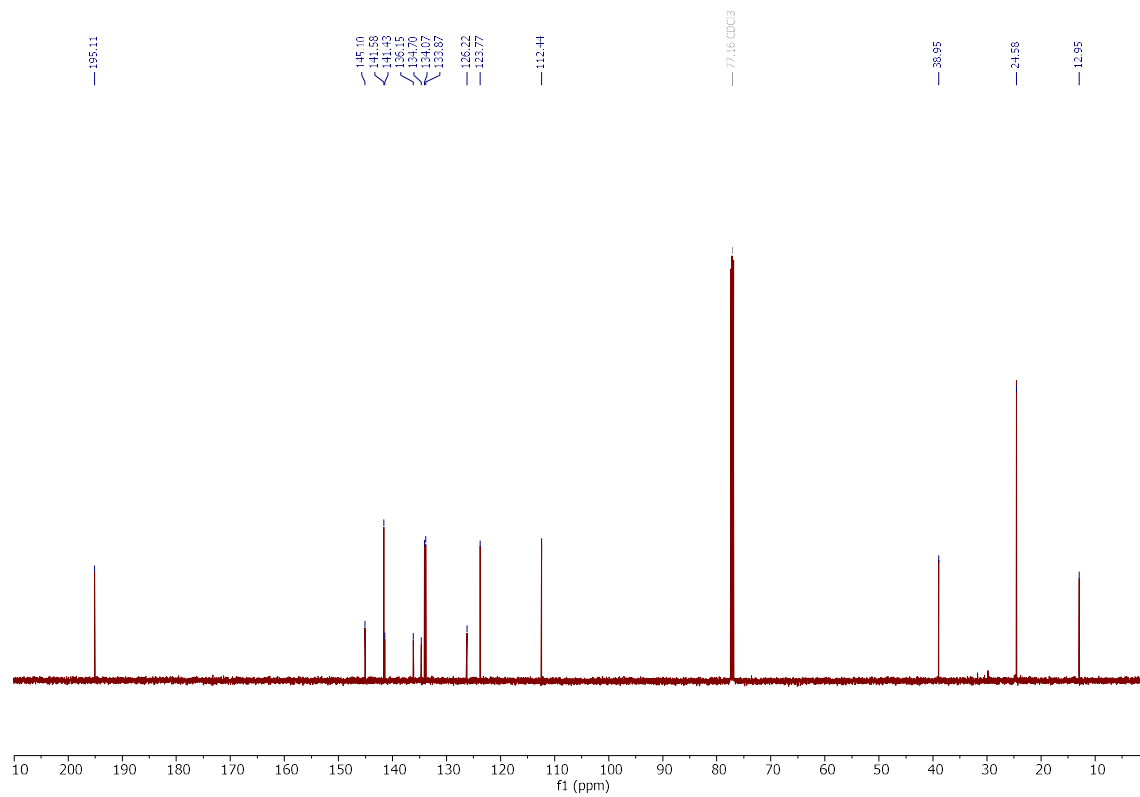

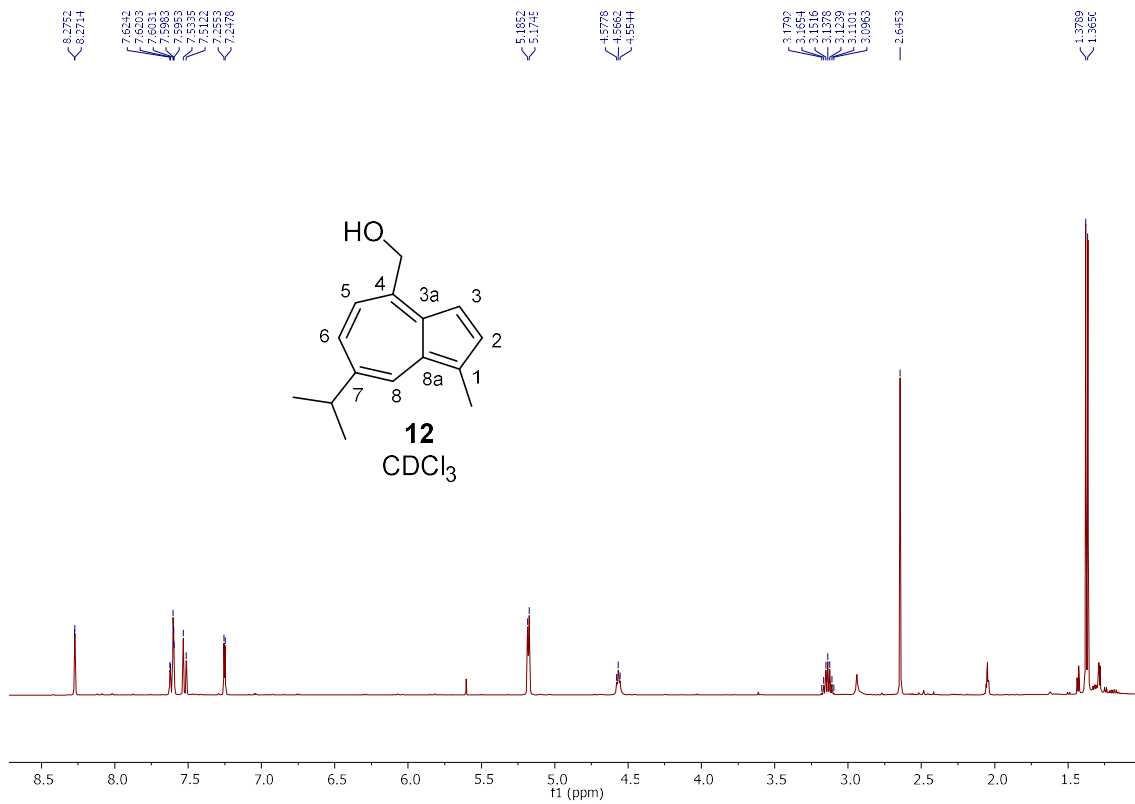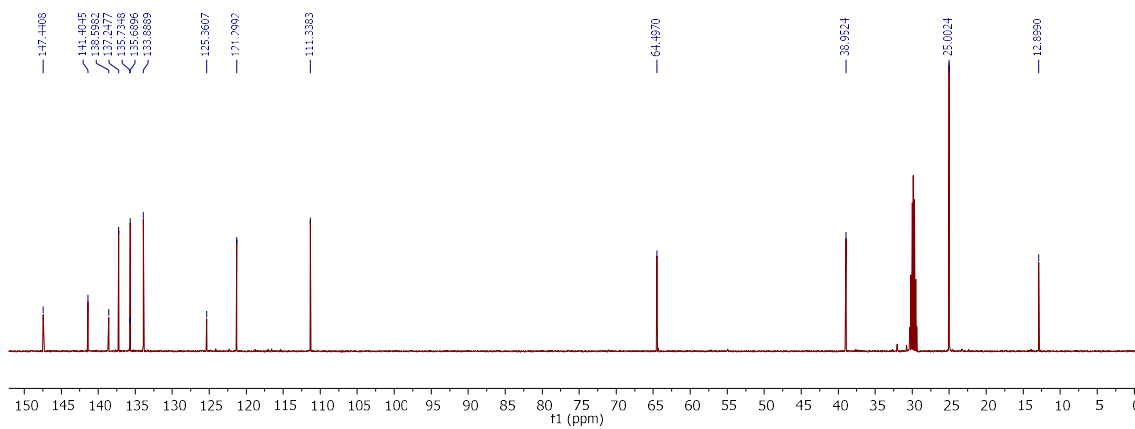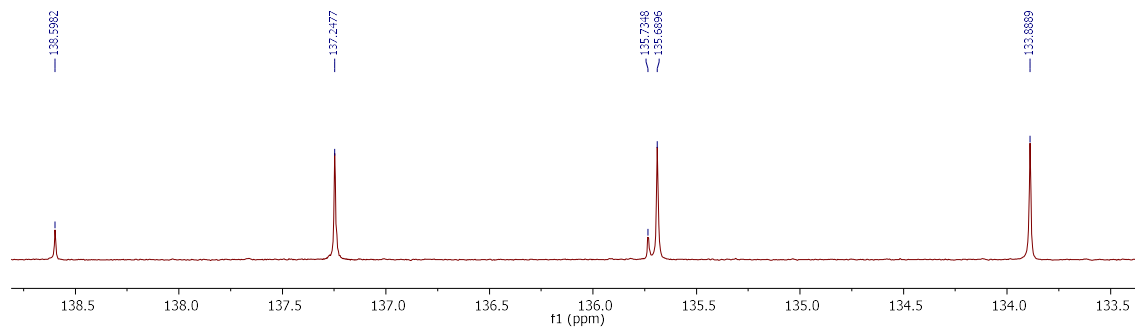

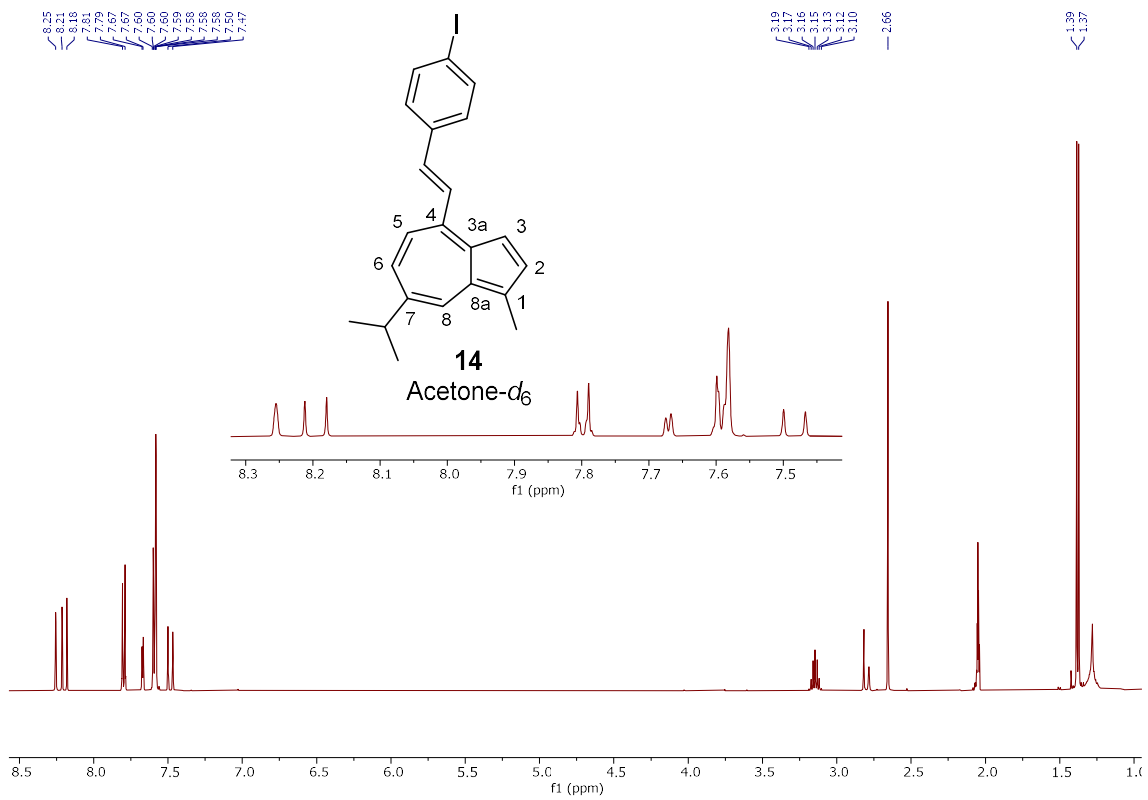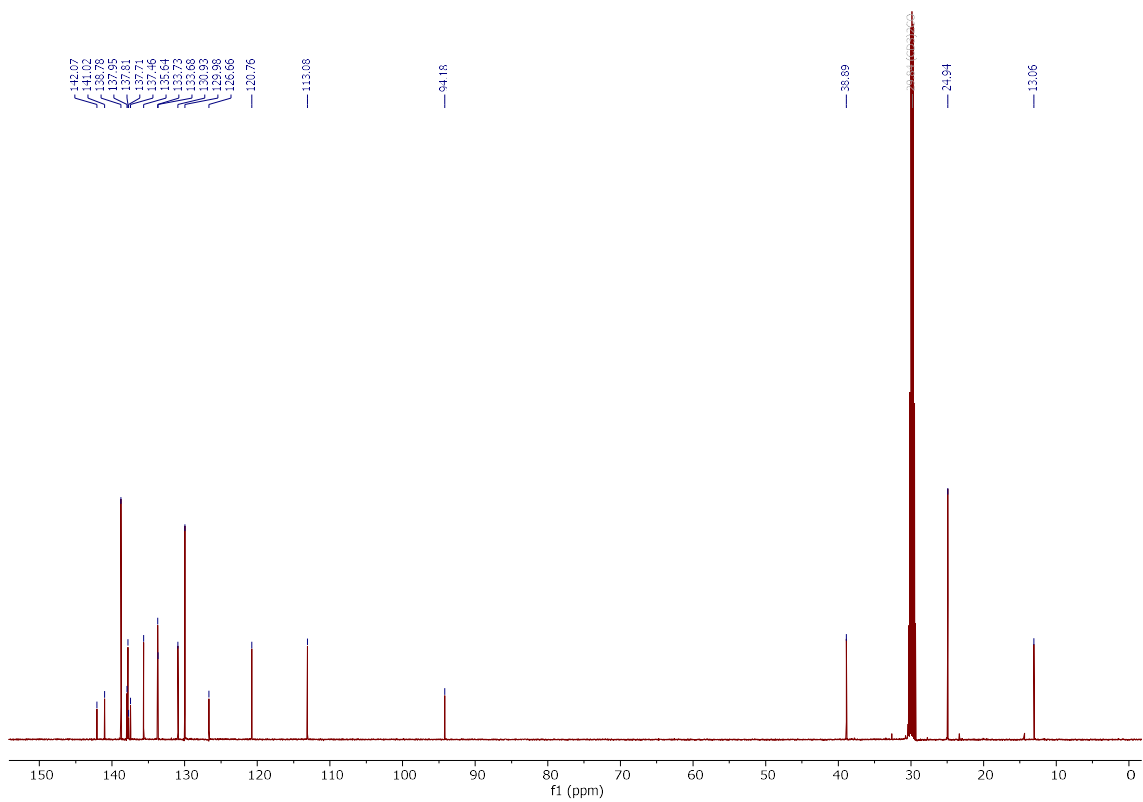

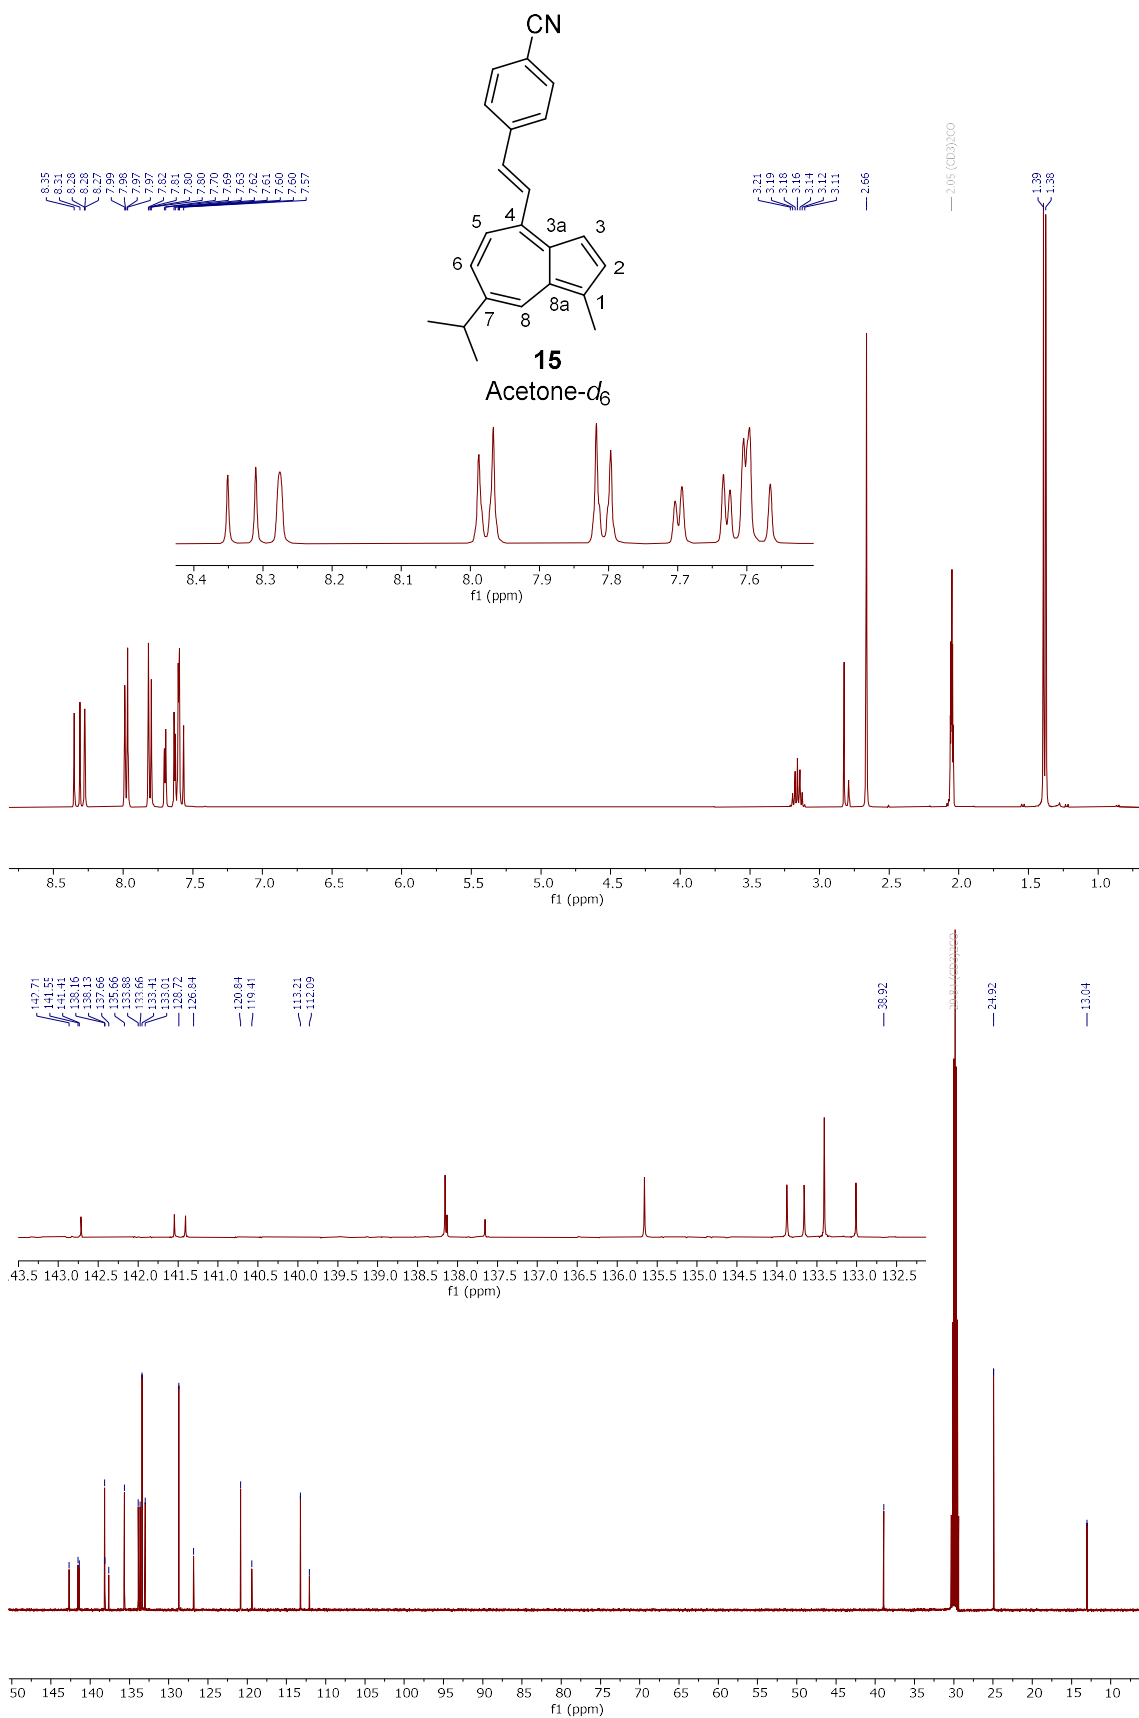

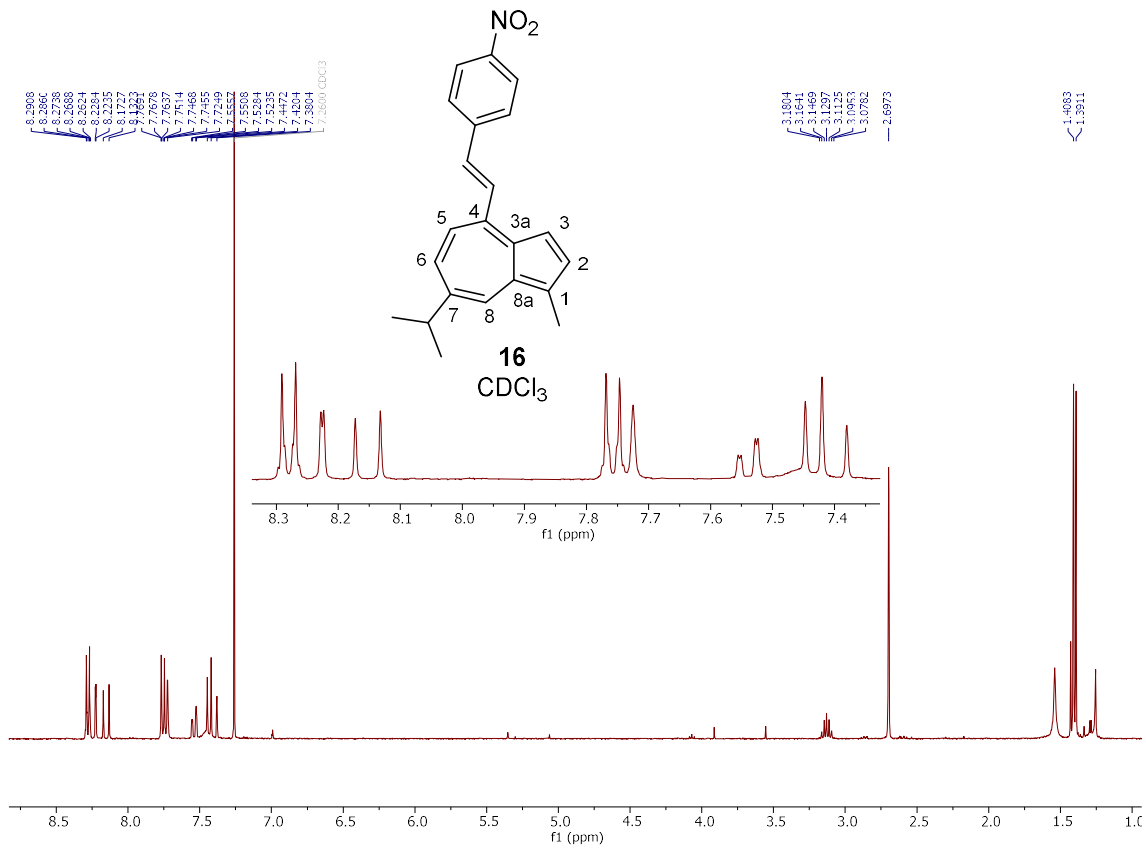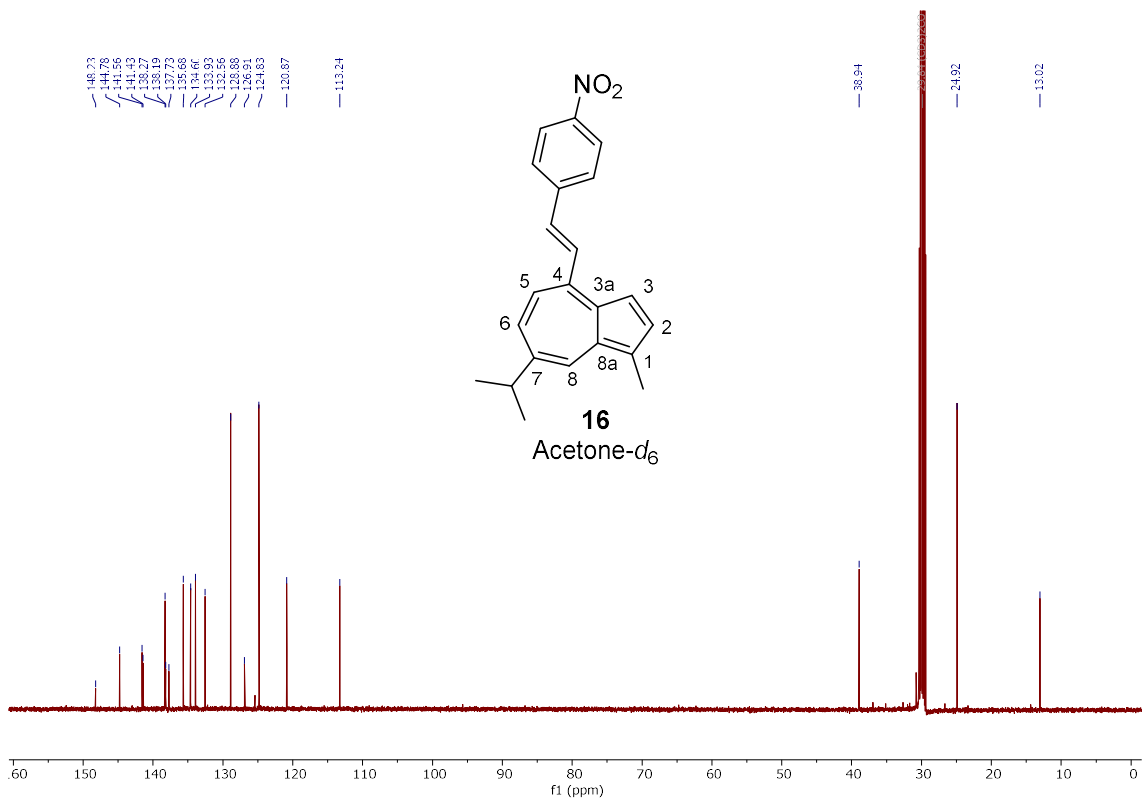

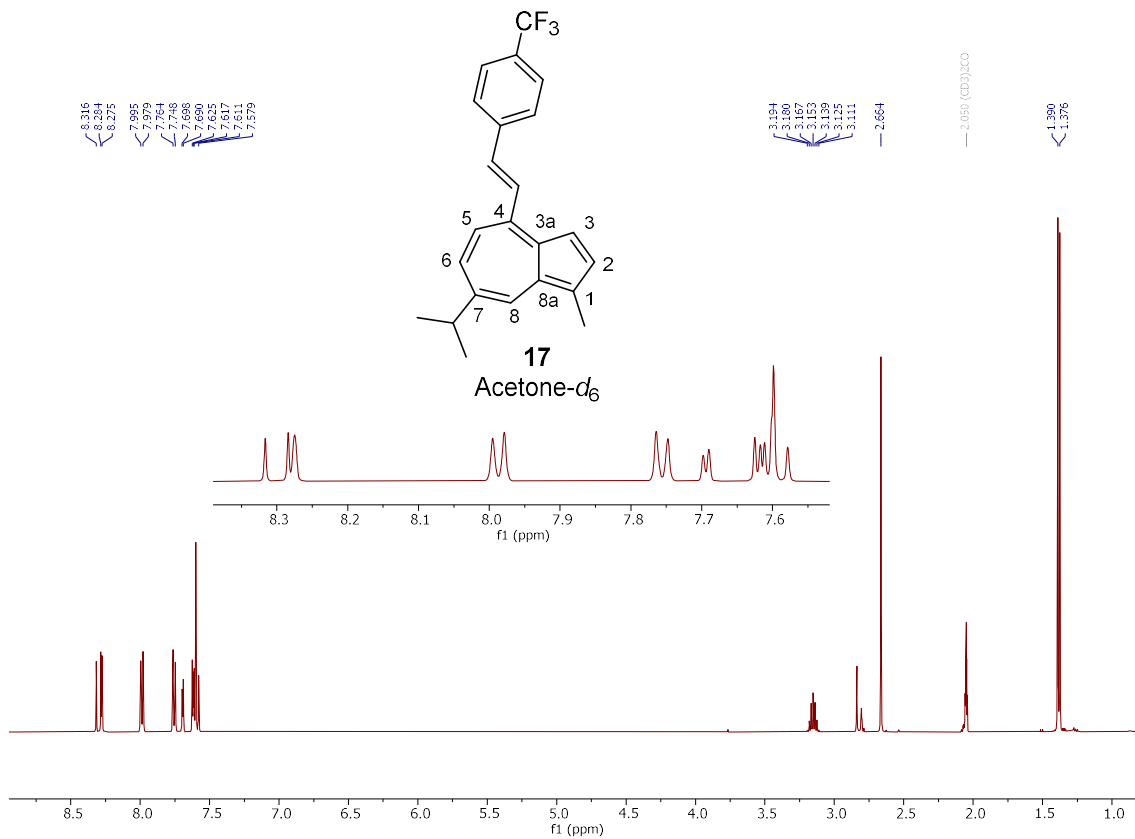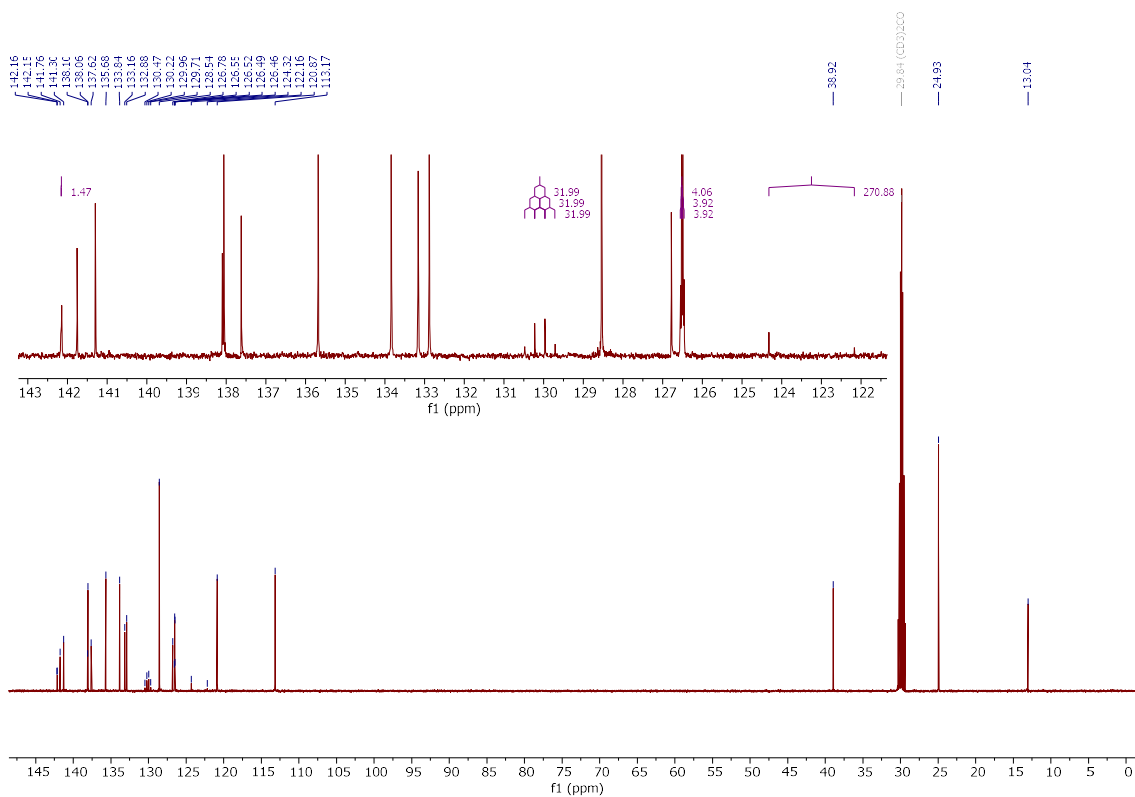

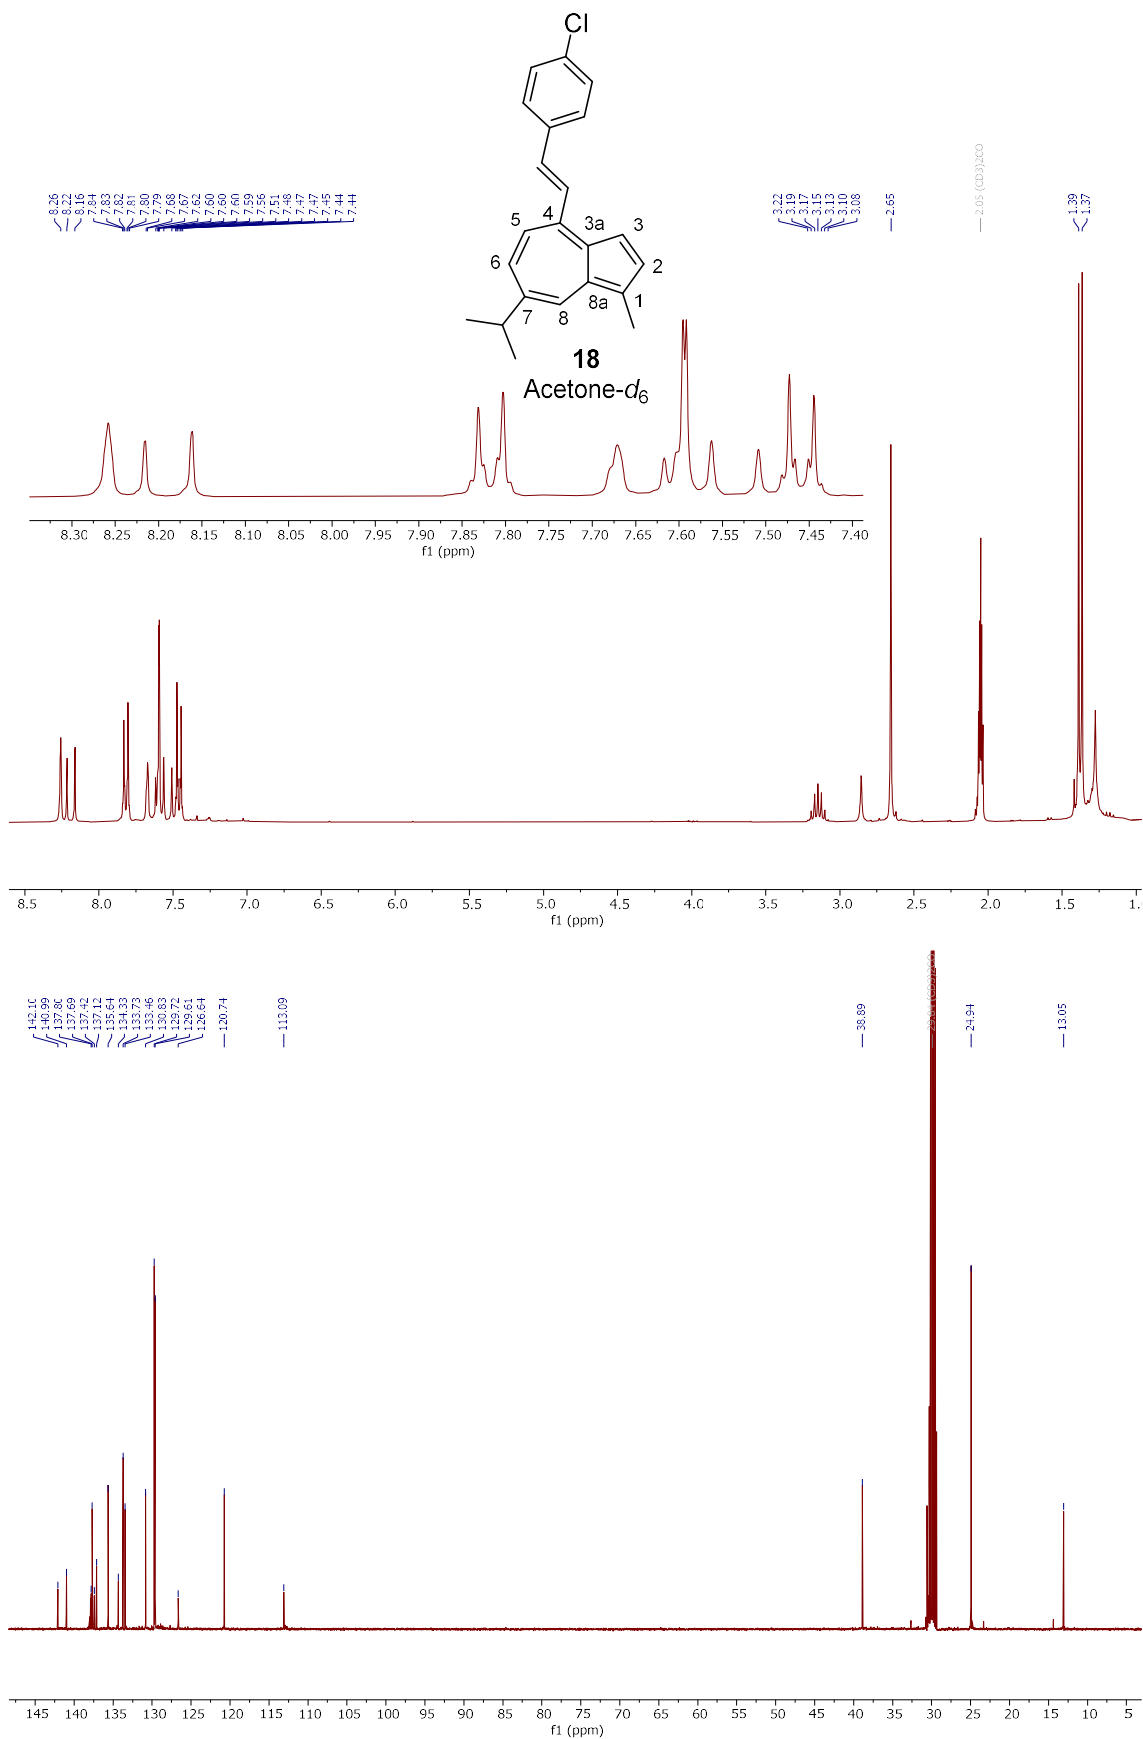



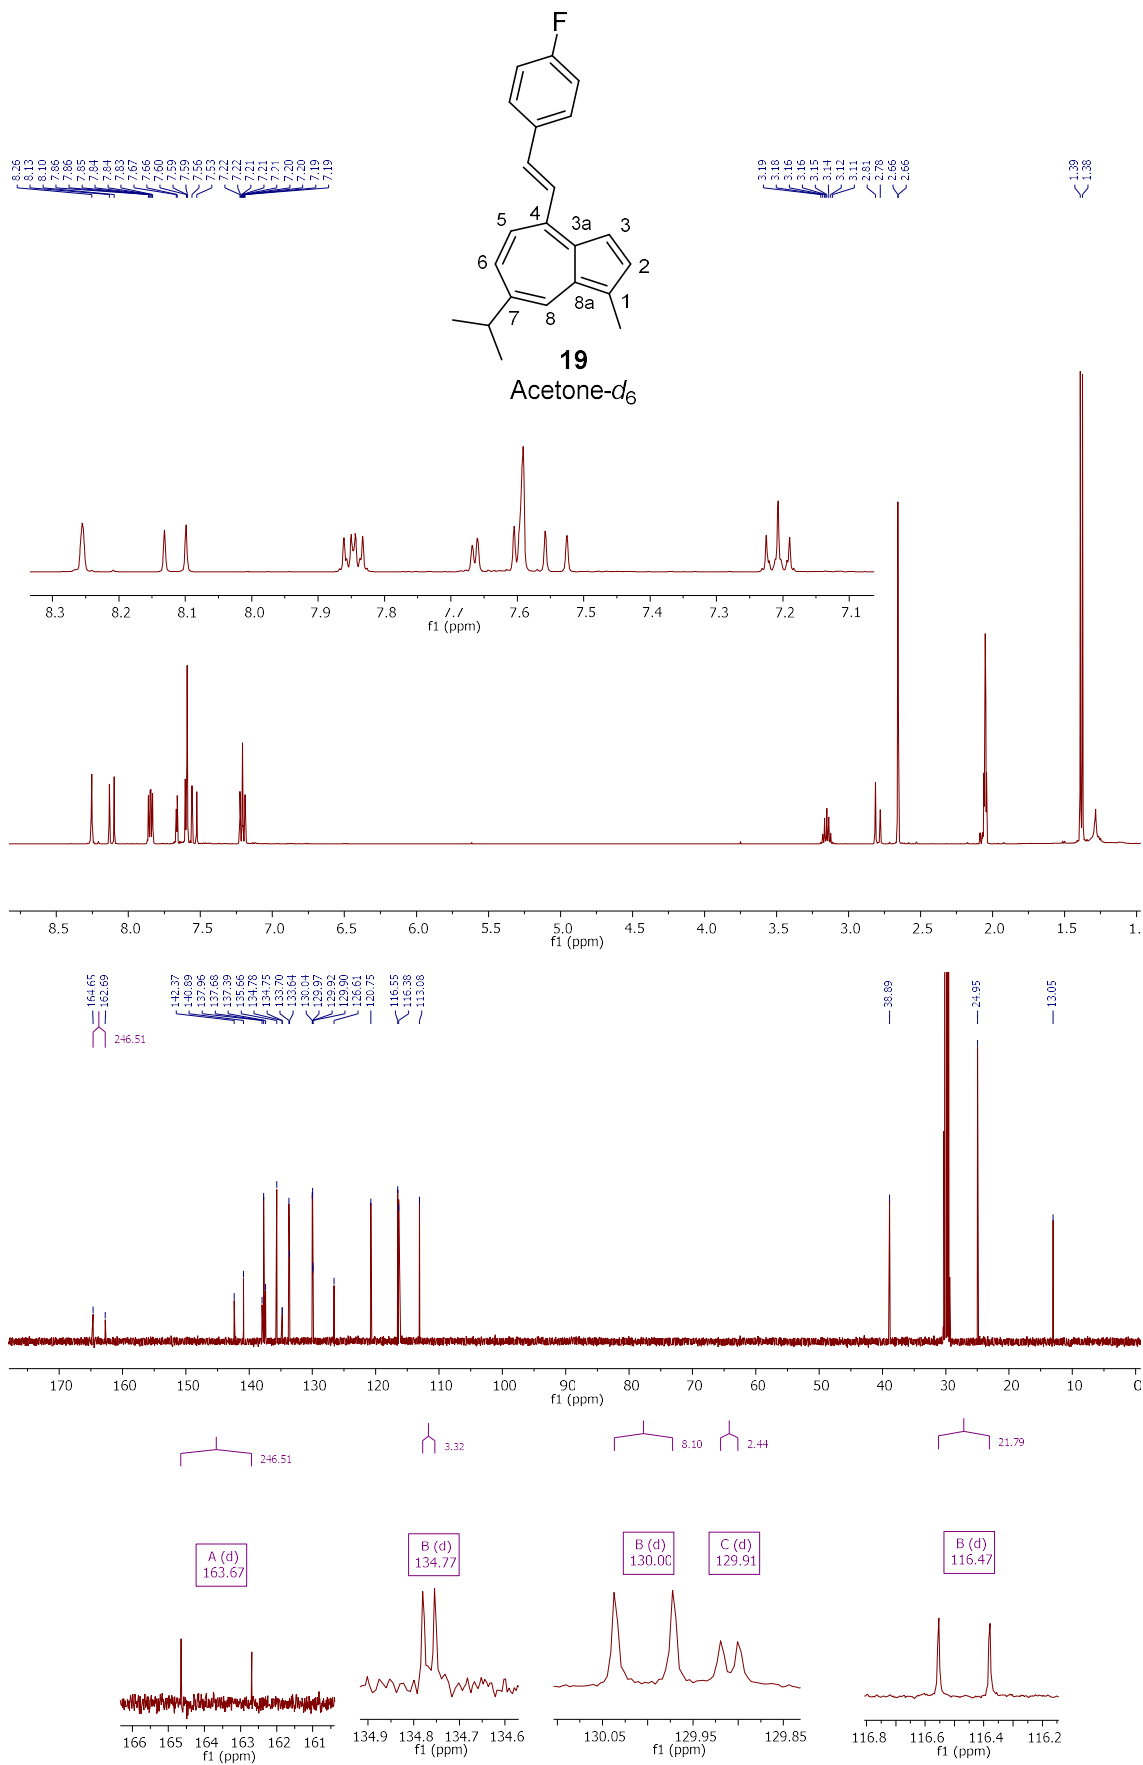

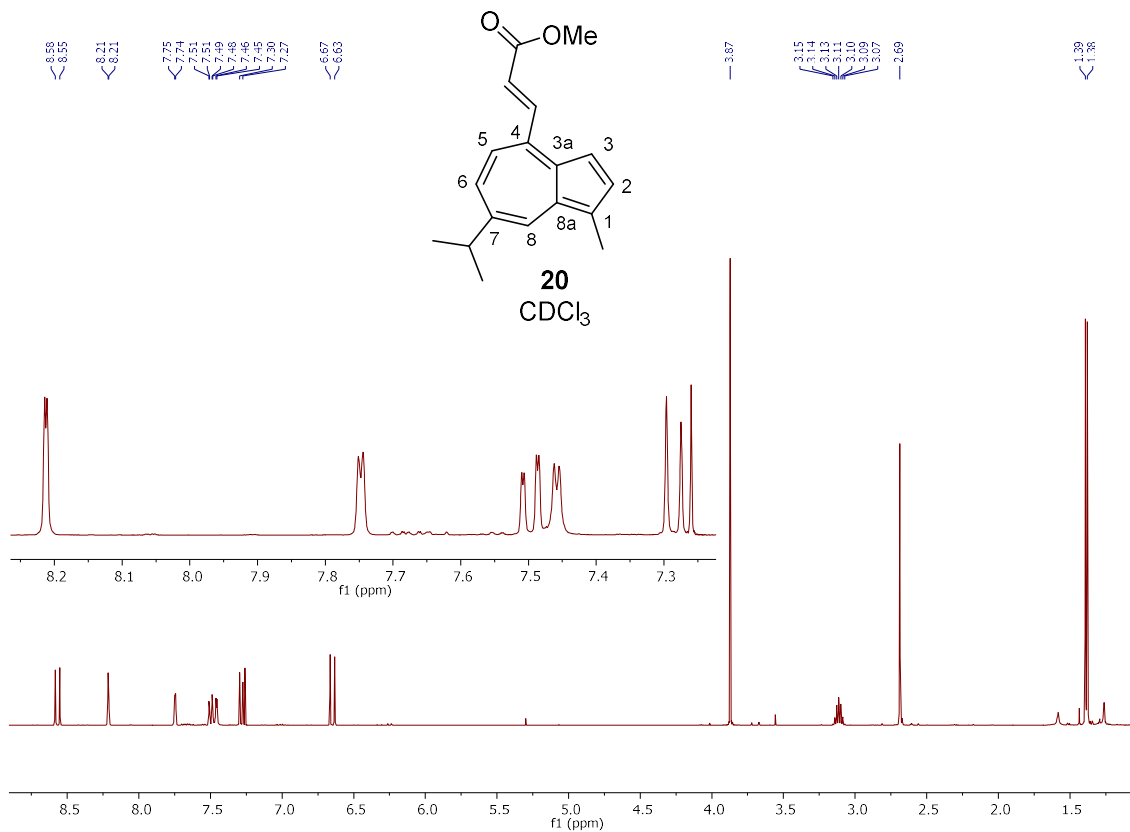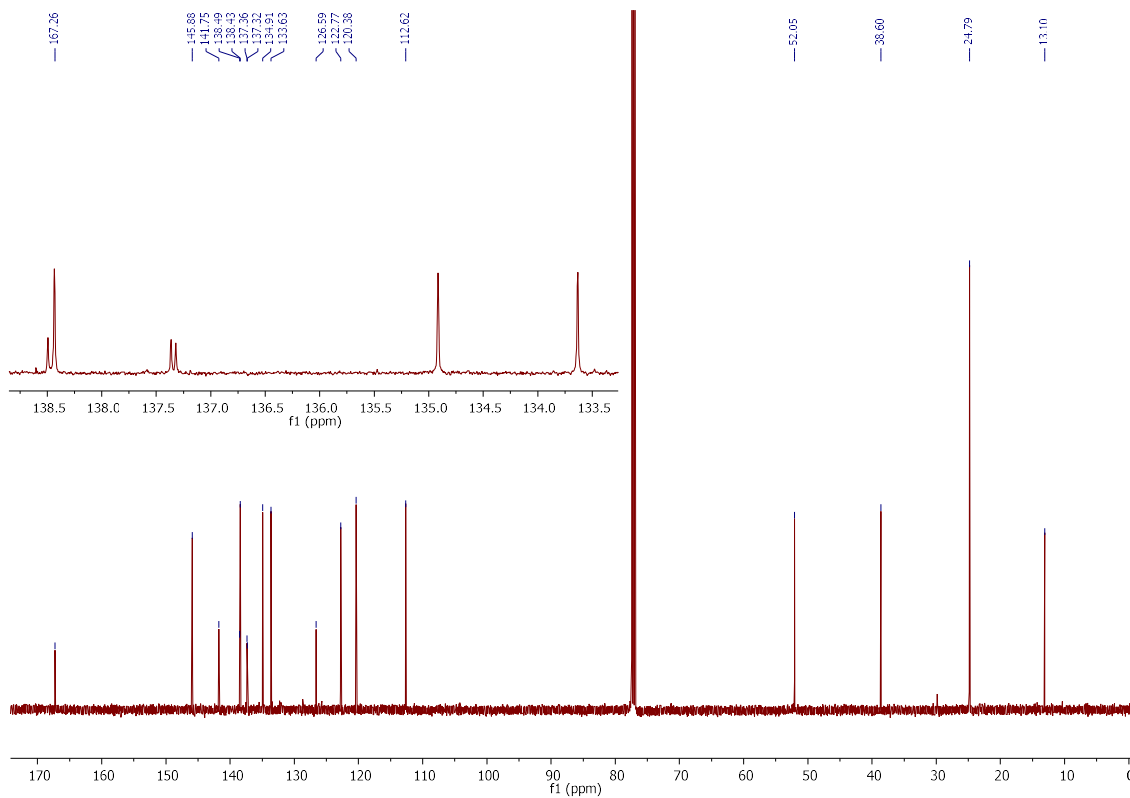

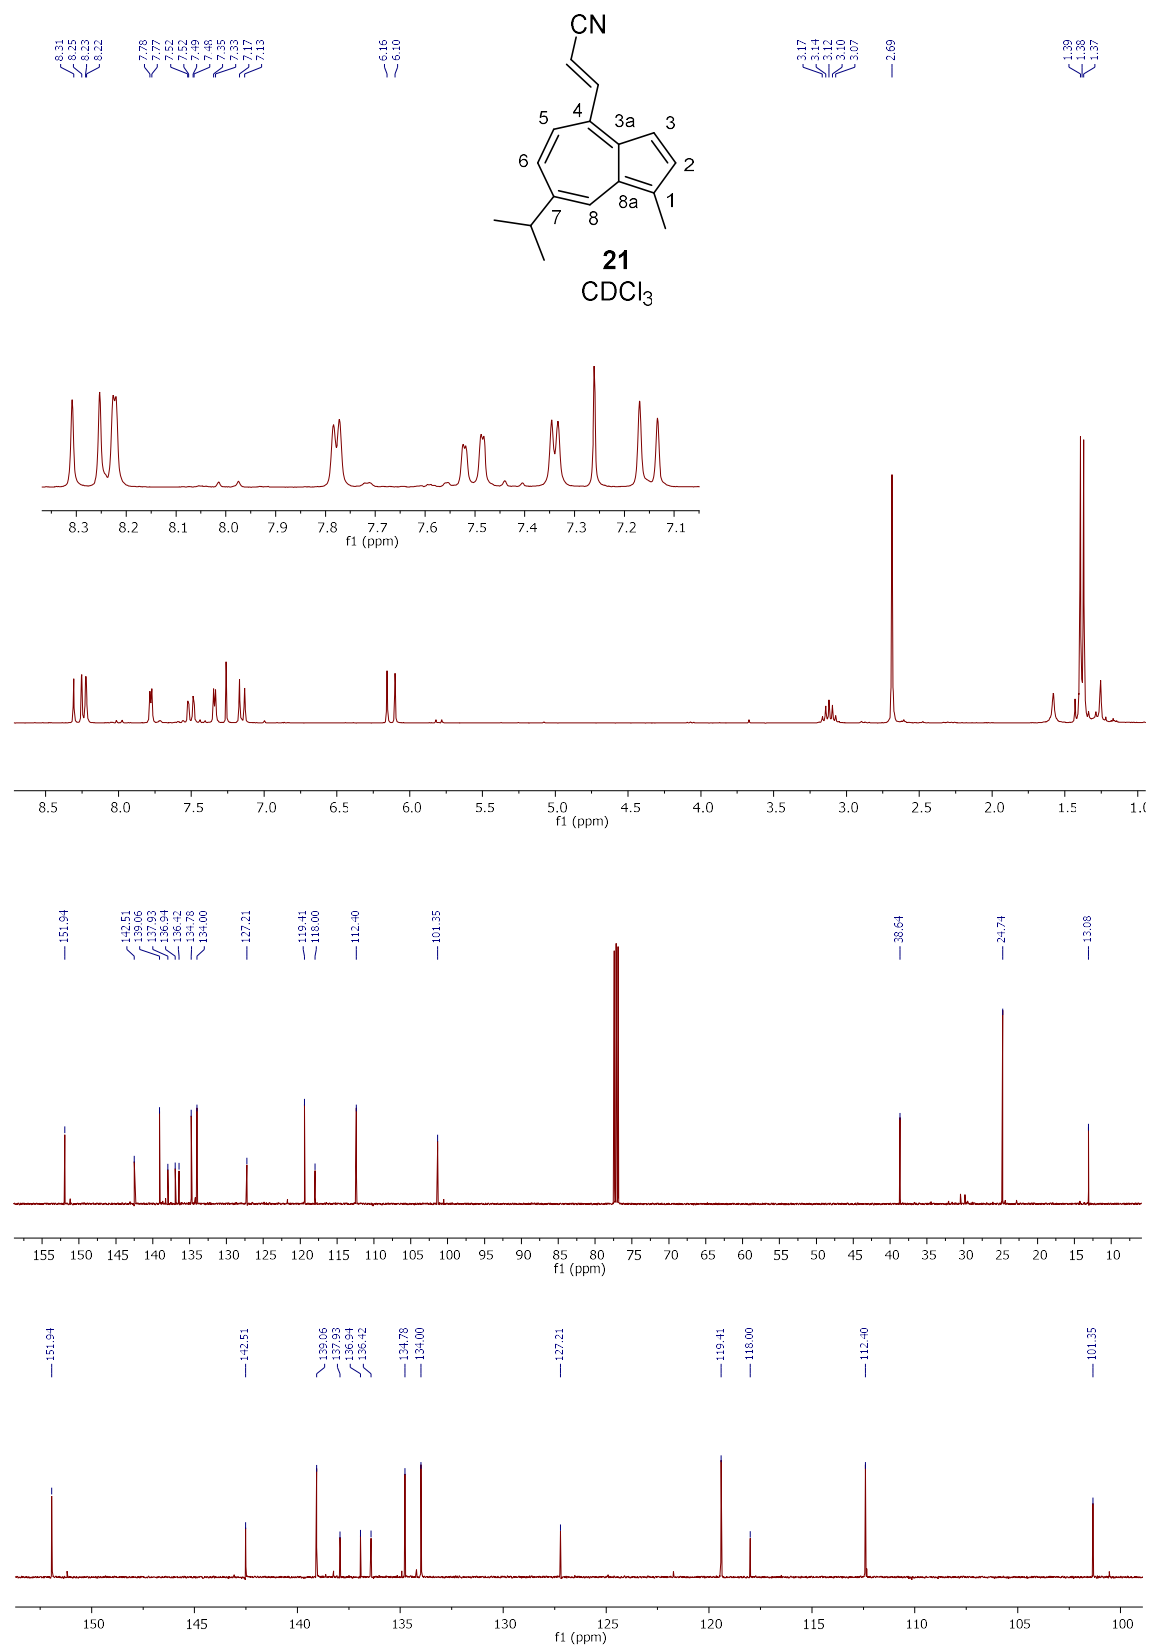

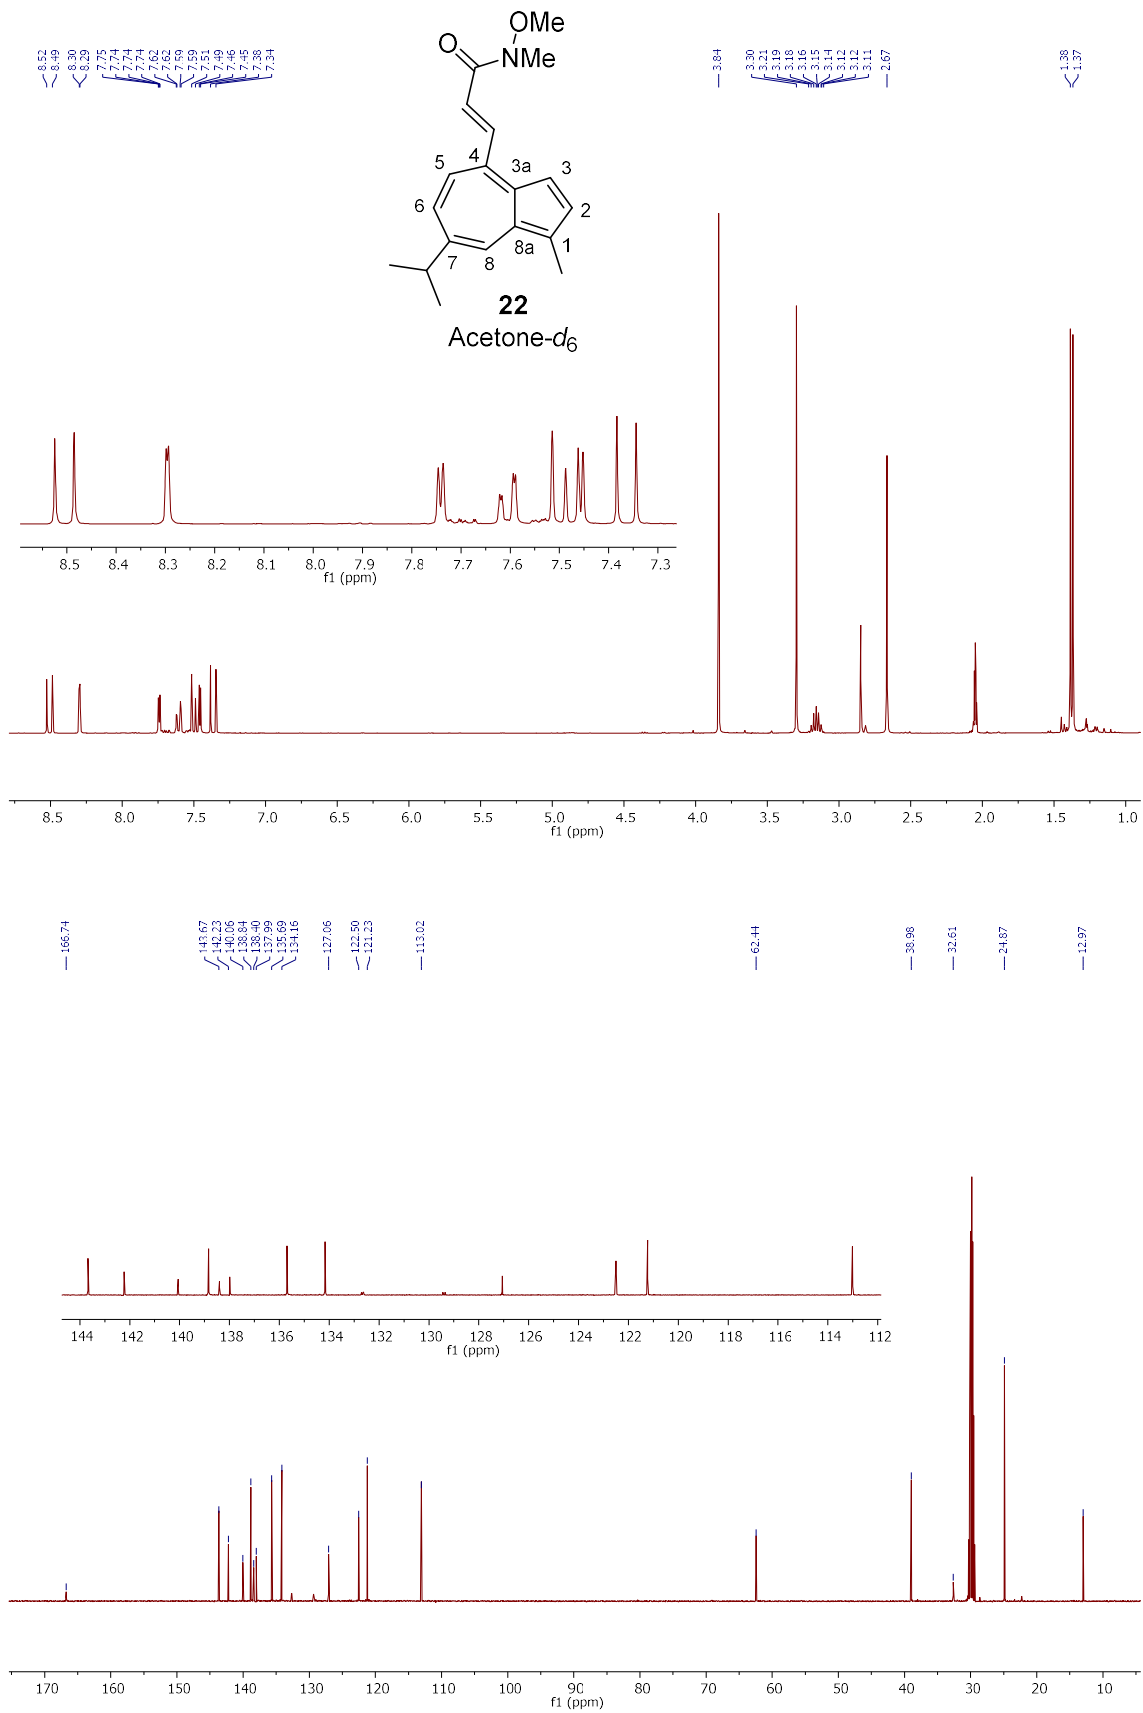

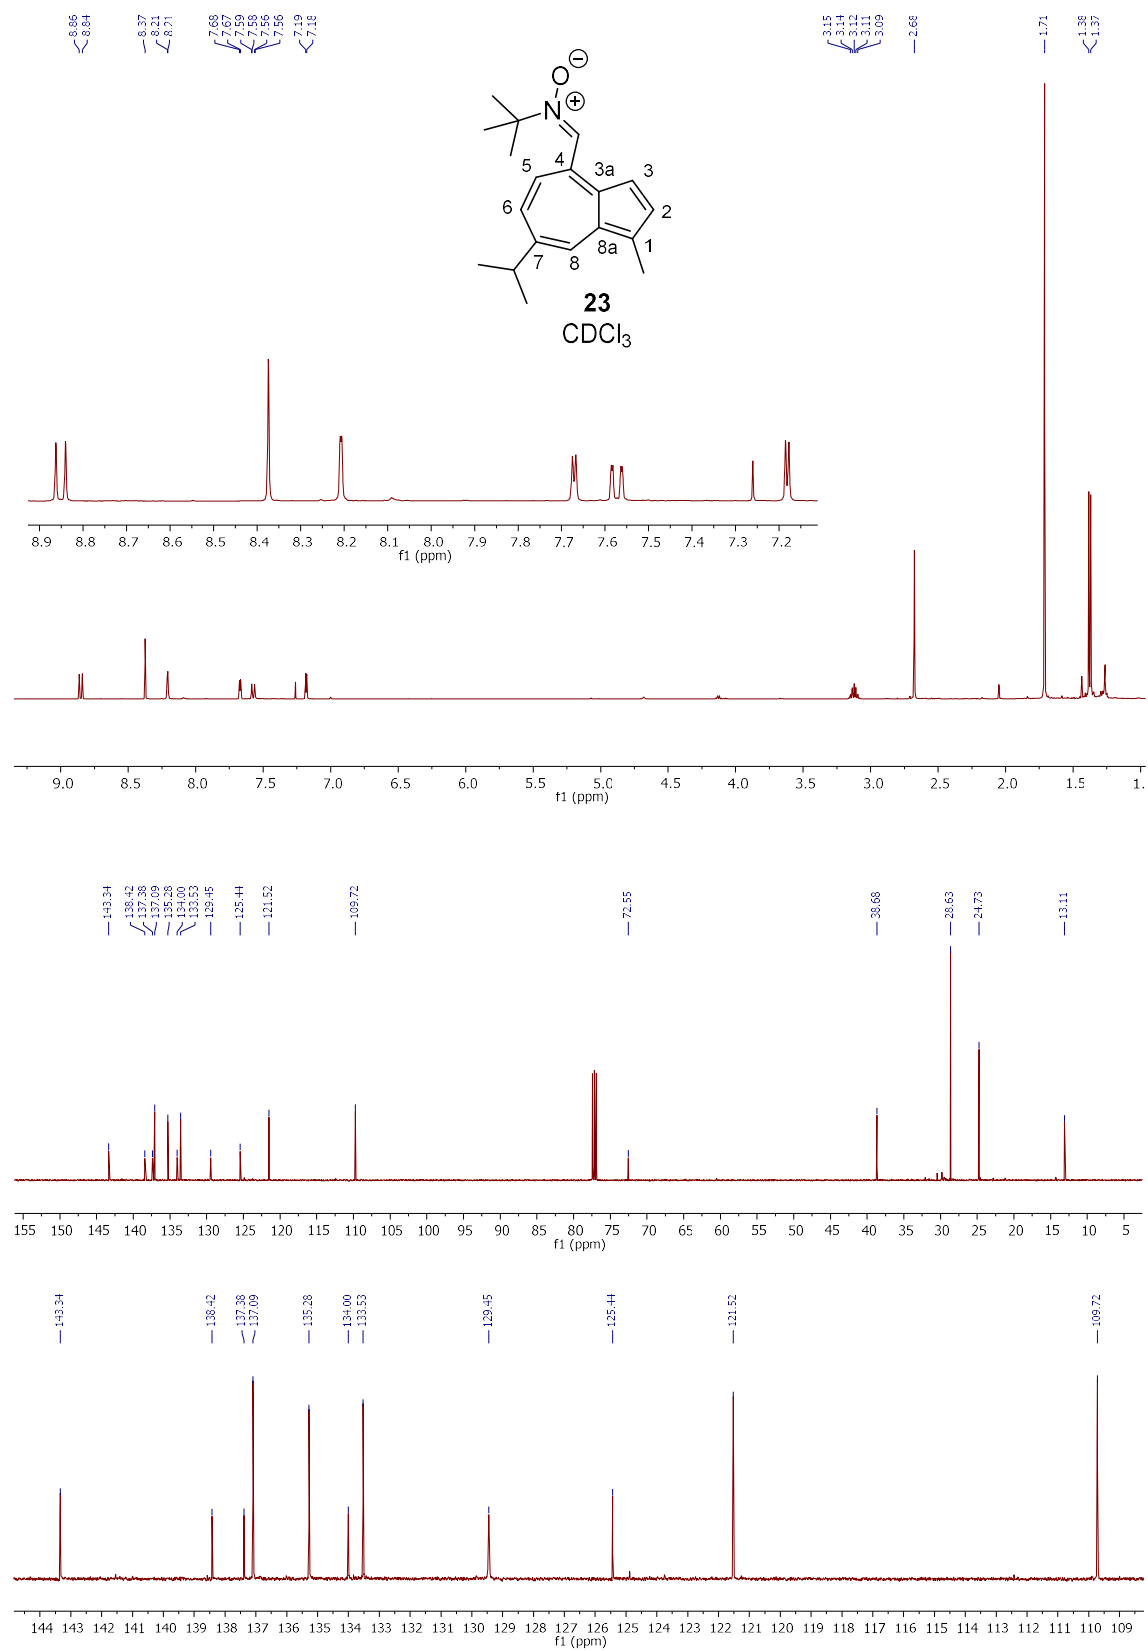

**Table S2.** Crystal data and structure refinement for **11**.

|                                   |                                             |          |
|-----------------------------------|---------------------------------------------|----------|
| Identification code               | CCDC <b>2047319</b>                         |          |
| Empirical formula                 | C <sub>15</sub> H <sub>16</sub> O           |          |
| Formula weight                    | 212.28                                      |          |
| Temperature                       | 150.01(10) K                                |          |
| Wavelength                        | 1.54184 Å                                   |          |
| Crystal system                    | Orthorhombic                                |          |
| Space group                       | Pnma                                        |          |
| Unit cell dimensions              | a = 10.37310(10) Å                          | α = 90°. |
|                                   | b = 6.72170(10) Å                           | β = 90°. |
|                                   | c = 16.6660(2) Å                            | γ = 90°. |
| Volume                            | 1162.03(2) Å <sup>3</sup>                   |          |
| Z                                 | 4                                           |          |
| Density (calculated)              | 1.213 Mg/m <sup>3</sup>                     |          |
| Absorption coefficient            | 0.572 mm <sup>-1</sup>                      |          |
| F(000)                            | 456                                         |          |
| Crystal size                      | 0.493 x 0.145 x 0.080 mm <sup>3</sup>       |          |
| Theta range for data collection   | 5.022 to 73.439°.                           |          |
| Index ranges                      | -12 ≤ h ≤ 11, -8 ≤ k ≤ 7, -20 ≤ l ≤ 20      |          |
| Reflections collected             | 11287                                       |          |
| Independent reflections           | 1277 [R(int) = 0.0371]                      |          |
| Completeness to θ = 67.684°       | 100.0 %                                     |          |
| Absorption correction             | Gaussian                                    |          |
| Max. and min. transmission        | 1.000 and 0.559                             |          |
| Refinement method                 | Full-matrix least-squares on F <sup>2</sup> |          |
| Data / restraints / parameters    | 1277 / 0 / 97                               |          |
| Goodness-of-fit on F <sup>2</sup> | 1.063                                       |          |
| Final R indices [I > 2σ(I)]       | R1 = 0.0431, wR2 = 0.1183                   |          |
| R indices (all data)              | R1 = 0.0442, wR2 = 0.1197                   |          |
| Extinction coefficient            | 0.0034(7)                                   |          |
| Largest diff. peak and hole       | 0.369 and -0.202 e.Å <sup>-3</sup>          |          |

**Table S3.** Atomic coordinates ( $\times 10^4$ ) and equivalent isotropic displacement parameters ( $\text{\AA}^2 \times 10^3$ ) for **11**.  $U(\text{eq})$  is defined as one third of the trace of the orthogonalized  $U^{ij}$  tensor.

|       | x       | y       | z       | U(eq) |
|-------|---------|---------|---------|-------|
| O     | 6959(1) | 2500    | 6716(1) | 35(1) |
| C(1)  | 6615(2) | 2500    | 6024(1) | 29(1) |
| C(2)  | 5245(1) | 2500    | 5752(1) | 23(1) |
| C(3)  | 4328(2) | 2500    | 6366(1) | 26(1) |
| C(4)  | 2992(1) | 2500    | 6334(1) | 25(1) |
| C(5)  | 2147(1) | 2500    | 5674(1) | 23(1) |
| C(6)  | 702(1)  | 2500    | 5854(1) | 28(1) |
| C(7)  | 290(1)  | 4359(2) | 6309(1) | 38(1) |
| C(8)  | 2512(1) | 2500    | 4872(1) | 23(1) |
| C(9)  | 3734(1) | 2500    | 4522(1) | 21(1) |
| C(10) | 3957(2) | 2500    | 3692(1) | 25(1) |
| C(11) | 2967(2) | 2500    | 3039(1) | 29(1) |
| C(12) | 5304(2) | 2500    | 3576(1) | 28(1) |
| C(13) | 5949(1) | 2500    | 4303(1) | 27(1) |
| C(14) | 5031(1) | 2500    | 4926(1) | 22(1) |

**Table S4.** Bond lengths [ $\text{\AA}$ ] for **11**.

|             |            |                |            |
|-------------|------------|----------------|------------|
| O-C(1)      | 1.208(2)   | C(8)-C(9)      | 1.395(2)   |
| C(1)-C(2)   | 1.491(2)   | C(8)-H(8)      | 0.9500     |
| C(1)-H(1)   | 0.9500     | C(9)-C(10)     | 1.4025(19) |
| C(2)-C(14)  | 1.394(2)   | C(9)-C(14)     | 1.5044(19) |
| C(2)-C(3)   | 1.397(2)   | C(10)-C(12)    | 1.410(2)   |
| C(3)-C(4)   | 1.387(2)   | C(10)-C(11)    | 1.497(2)   |
| C(3)-H(3)   | 0.9500     | C(11)-H(11A)   | 0.9800     |
| C(4)-C(5)   | 1.406(2)   | C(11)-H(11B)   | 0.9800     |
| C(4)-H(4)   | 0.9500     | C(11)-H(11C)   | 0.9800     |
| C(5)-C(8)   | 1.389(2)   | C(11)-H(11A)#1 | 0.980(13)  |
| C(5)-C(6)   | 1.5288(19) | C(11)-H(11B)#1 | 0.980(9)   |
| C(6)-C(7)   | 1.5231(15) | C(11)-H(11C)#1 | 0.980(4)   |
| C(6)-C(7)#1 | 1.5232(15) | C(12)-C(13)    | 1.384(2)   |
| C(6)-H(6)   | 1.0000     | C(12)-H(12)    | 0.9500     |
| C(7)-H(7A)  | 0.9800     | C(13)-C(14)    | 1.409(2)   |
| C(7)-H(7B)  | 0.9800     | C(13)-H(13)    | 0.9500     |
| C(7)-H(7C)  | 0.9800     |                |            |

**Table S5.** Bond angles [°] for **11**.

|                  |            |                         |            |
|------------------|------------|-------------------------|------------|
| O-C(1)-C(2)      | 124.90(15) | C(9)-C(10)-C(12)        | 107.38(13) |
| O-C(1)-H(1)      | 117.5      | C(9)-C(10)-C(11)        | 127.16(14) |
| C(2)-C(1)-H(1)   | 117.5      | C(12)-C(10)-C(11)       | 125.46(14) |
| C(14)-C(2)-C(3)  | 127.91(13) | C(10)-C(11)-H(11A)      | 109.5      |
| C(14)-C(2)-C(1)  | 116.90(13) | C(10)-C(11)-H(11B)      | 109.5      |
| C(3)-C(2)-C(1)   | 115.19(13) | H(11A)-C(11)-H(11B)     | 109.5      |
| C(4)-C(3)-C(2)   | 130.66(13) | C(10)-C(11)-H(11C)      | 109.5      |
| C(4)-C(3)-H(3)   | 114.7      | H(11A)-C(11)-H(11C)     | 109.5      |
| C(2)-C(3)-H(3)   | 114.7      | H(11B)-C(11)-H(11C)     | 109.5      |
| C(3)-C(4)-C(5)   | 130.78(13) | C(10)-C(11)-H(11A)#1    | 109.5(3)   |
| C(3)-C(4)-H(4)   | 114.6      | H(11A)-C(11)-H(11A)#1   | 71.7       |
| C(5)-C(4)-H(4)   | 114.6      | H(11B)-C(11)-H(11A)#1   | 137.7      |
| C(8)-C(5)-C(4)   | 125.62(13) | H(11C)-C(11)-H(11A)#1   | 40.6       |
| C(8)-C(5)-C(6)   | 117.16(13) | C(10)-C(11)-H(11B)#1    | 109.5(2)   |
| C(4)-C(5)-C(6)   | 117.21(12) | H(11A)-C(11)-H(11B)#1   | 137.7      |
| C(7)-C(6)-C(7)#1 | 110.27(13) | H(11B)-C(11)-H(11B)#1   | 40.6       |
| C(7)-C(6)-C(5)   | 111.89(8)  | H(11C)-C(11)-H(11B)#1   | 71.7       |
| C(7)#1-C(6)-C(5) | 111.89(8)  | H(11A)#1-C(11)-H(11B)#1 | 109.5      |
| C(7)-C(6)-H(6)   | 107.5      | C(10)-C(11)-H(11C)#1    | 109.47(8)  |
| C(7)#1-C(6)-H(6) | 107.5      | H(11A)-C(11)-H(11C)#1   | 40.6       |
| C(5)-C(6)-H(6)   | 107.5      | H(11B)-C(11)-H(11C)#1   | 71.7       |
| C(6)-C(7)-H(7A)  | 109.5      | H(11C)-C(11)-H(11C)#1   | 137.7      |
| C(6)-C(7)-H(7B)  | 109.5      | H(11A)#1-C(11)-H(11C)#1 | 109.5      |
| H(7A)-C(7)-H(7B) | 109.5      | H(11B)#1-C(11)-H(11C)#1 | 109.5      |
| C(6)-C(7)-H(7C)  | 109.5      | C(13)-C(12)-C(10)       | 111.05(13) |
| H(7A)-C(7)-H(7C) | 109.5      | C(13)-C(12)-H(12)       | 124.5      |
| H(7B)-C(7)-H(7C) | 109.5      | C(10)-C(12)-H(12)       | 124.5      |
| C(5)-C(8)-C(9)   | 130.56(14) | C(12)-C(13)-C(14)       | 108.57(13) |
| C(5)-C(8)-H(8)   | 114.7      | C(12)-C(13)-H(13)       | 125.7      |
| C(9)-C(8)-H(8)   | 114.7      | C(14)-C(13)-H(13)       | 125.7      |
| C(8)-C(9)-C(10)  | 124.22(14) | C(2)-C(14)-C(13)        | 128.30(14) |
| C(8)-C(9)-C(14)  | 128.68(13) | C(2)-C(14)-C(9)         | 125.78(13) |
| C(10)-C(9)-C(14) | 107.09(12) | C(13)-C(14)-C(9)        | 105.91(13) |

Symmetry transformations used to generate equivalent atoms: #1 x,-y+1/2,z



**Table S6.** Anisotropic displacement parameters ( $\text{\AA}^2 \times 10^3$ ) for **11**. The anisotropic displacement factor exponent takes the form:  $-2\pi^2 [ h^2 a^{*2} U^{11} + \dots + 2 h k a^* b^* U^{12} ]$

|       | $U^{11}$ | $U^{22}$ | $U^{33}$ | $U^{23}$ | $U^{13}$ | $U^{12}$ |
|-------|----------|----------|----------|----------|----------|----------|
| O     | 29(1)    | 40(1)    | 37(1)    | 0        | -12(1)   | 0        |
| C(1)  | 22(1)    | 32(1)    | 34(1)    | 0        | -5(1)    | 0        |
| C(2)  | 20(1)    | 20(1)    | 28(1)    | 0        | -4(1)    | 0        |
| C(3)  | 26(1)    | 27(1)    | 23(1)    | 0        | -5(1)    | 0        |
| C(4)  | 24(1)    | 29(1)    | 22(1)    | 0        | 1(1)     | 0        |
| C(5)  | 20(1)    | 24(1)    | 26(1)    | 0        | 0(1)     | 0        |
| C(6)  | 20(1)    | 37(1)    | 27(1)    | 0        | 0(1)     | 0        |
| C(7)  | 27(1)    | 33(1)    | 55(1)    | 1(1)     | 5(1)     | 6(1)     |
| C(8)  | 21(1)    | 23(1)    | 24(1)    | 0        | -4(1)    | 0        |
| C(9)  | 21(1)    | 20(1)    | 23(1)    | 0        | -2(1)    | 0        |
| C(10) | 27(1)    | 23(1)    | 24(1)    | 0        | 0(1)     | 0        |
| C(11) | 33(1)    | 31(1)    | 22(1)    | 0        | -1(1)    | 0        |
| C(12) | 29(1)    | 29(1)    | 28(1)    | 0        | 7(1)     | 0        |
| C(13) | 20(1)    | 28(1)    | 33(1)    | 0        | 3(1)     | 0        |
| C(14) | 20(1)    | 19(1)    | 29(1)    | 0        | -1(1)    | 0        |

**Table S7.** Hydrogen coordinates ( $\times 10^4$ ) and isotropic displacement parameters ( $\text{\AA}^2 \times 10^{-3}$ ) for **11**.

|        | x    | y    | z    | U(eq) |
|--------|------|------|------|-------|
| H(1)   | 7265 | 2500 | 5623 | 35    |
| H(3)   | 4678 | 2500 | 6893 | 31    |
| H(4)   | 2578 | 2500 | 6842 | 30    |
| H(6)   | 237  | 2500 | 5328 | 33    |
| H(7A)  | 547  | 5544 | 6006 | 57    |
| H(7B)  | 707  | 4377 | 6837 | 57    |
| H(7C)  | -648 | 4353 | 6378 | 57    |
| H(8)   | 1817 | 2500 | 4501 | 27    |
| H(11A) | 2243 | 1646 | 3194 | 43    |
| H(11B) | 3353 | 1994 | 2542 | 43    |
| H(11C) | 2656 | 3860 | 2952 | 43    |
| H(12)  | 5714 | 2500 | 3066 | 34    |
| H(13)  | 6858 | 2500 | 4370 | 32    |

**Table S8.** Torsion angles [ $^\circ$ ] for **11**.

|                       |            |                         |            |
|-----------------------|------------|-------------------------|------------|
| O-C(1)-C(2)-C(14)     | 180.000(1) | C(14)-C(9)-C(10)-C(12)  | 0.000(1)   |
| O-C(1)-C(2)-C(3)      | 0.000(1)   | C(8)-C(9)-C(10)-C(11)   | 0.000(1)   |
| C(14)-C(2)-C(3)-C(4)  | 0.000(1)   | C(14)-C(9)-C(10)-C(11)  | 180.000(1) |
| C(1)-C(2)-C(3)-C(4)   | 180.000(1) | C(9)-C(10)-C(12)-C(13)  | 0.000(1)   |
| C(2)-C(3)-C(4)-C(5)   | 0.000(1)   | C(11)-C(10)-C(12)-C(13) | 180.000(1) |
| C(3)-C(4)-C(5)-C(8)   | 0.000(1)   | C(10)-C(12)-C(13)-C(14) | 0.000(1)   |
| C(3)-C(4)-C(5)-C(6)   | 180.000(1) | C(3)-C(2)-C(14)-C(13)   | 180.000(1) |
| C(8)-C(5)-C(6)-C(7)   | -117.84(9) | C(1)-C(2)-C(14)-C(13)   | 0.000(1)   |
| C(4)-C(5)-C(6)-C(7)   | 62.16(9)   | C(3)-C(2)-C(14)-C(9)    | 0.000(1)   |
| C(8)-C(5)-C(6)-C(7)#1 | 117.84(9)  | C(1)-C(2)-C(14)-C(9)    | 180.000(1) |
| C(4)-C(5)-C(6)-C(7)#1 | -62.16(9)  | C(12)-C(13)-C(14)-C(2)  | 180.000(1) |
| C(4)-C(5)-C(8)-C(9)   | 0.000(1)   | C(12)-C(13)-C(14)-C(9)  | 0.000(1)   |
| C(6)-C(5)-C(8)-C(9)   | 180.000(1) | C(8)-C(9)-C(14)-C(2)    | 0.000(1)   |
| C(5)-C(8)-C(9)-C(10)  | 180.000(1) | C(10)-C(9)-C(14)-C(2)   | 180.000(1) |
| C(5)-C(8)-C(9)-C(14)  | 0.000(1)   | C(8)-C(9)-C(14)-C(13)   | 180.000(1) |
| C(8)-C(9)-C(10)-C(12) | 180.000(1) | C(10)-C(9)-C(14)-C(13)  | 0.000(1)   |

Symmetry transformations used to generate equivalent atoms:

#1 x,-y+1/2,z
